# Supplementary material for: The enhanced two-photon absorption behavior of twistfuranacenes to phenylacetylene-functionalized twistacenes
Source: Royal Society of Chemistry journal article supplement (doi:10.1039/c9tc01568j), 2019-01-01
Supplement: c9tc01568j1.pdf [file c9tc01568j1.pdf]

## **The Enhanced Two-Photon Absorption Behavior of Twistfuranacenes to Phenylacetylene-Functionalized Twistacenes**

Tingting Song,<sup>a</sup> Yanbing Han,<sup>b</sup> Pengcheng Jin,<sup>a</sup> Yamei Shi,<sup>a</sup> Xiaofang Li,<sup>c</sup> Yinglin Song,<sup>\*b</sup> and Jinchong Xiao<sup>\*a</sup>

<sup>a</sup> College of Chemistry and Environmental Science, Key Laboratory of Chemical Biology of Hebei Province, Key Laboratory of Medicinal Chemistry and Molecular Diagnosis, Ministry of Education, Hebei University, Baoding 071002, P. R. China

\*E-mail: jcxiaoicas@163.com

<sup>b</sup> Department of Physics, Harbin Institute of Technology, Harbin 150001, P. R. China

\*E-mail: ylsong@hit.edu.cn

<sup>c</sup> School of Chemistry and Chemical Engineering, Hunan University of Science and Technology, Xiangtan, Hunan 411201, P. R. China

**Table S1. Crystallographic Data for the Resulting Derivatives.**

|                                    | <b>2</b>                            | <b>3b</b>                                      | <b>5a</b>                          | <b>5b</b>                                      |
|------------------------------------|-------------------------------------|------------------------------------------------|------------------------------------|------------------------------------------------|
| formula                            | C <sub>45</sub> H <sub>39</sub> BrO | C <sub>54</sub> H <sub>46</sub> O <sub>2</sub> | C <sub>52</sub> H <sub>41</sub> FO | C <sub>53</sub> H <sub>44</sub> O <sub>2</sub> |
| Formula weight                     | 675.7                               | 726.9                                          | 700.9                              | 712.9                                          |
| Crystal system                     | monoclinic                          | triclinic                                      | monoclinic                         | orthorhombic                                   |
| Space group                        | P2(1)/n                             | P-1                                            | P2/c                               | Fdd2                                           |
| <i>a</i> [Å]                       | 14.7129(12)                         | 14.8148(13)                                    | 19.0001(19)                        | 17.9559(15)                                    |
| <i>b</i> [Å]                       | 27.748(3)                           | 15.4447(14)                                    | 7.8680(7)                          | 69.780(4)                                      |
| <i>c</i> [Å]                       | 18.5982(16)                         | 23.368(2)                                      | 27.690(3)                          | 13.5926(12)                                    |
| <i>α</i> (deg)                     | 90.00                               | 75.758(2)                                      | 90.00                              | 90.00                                          |
| <i>β</i> (deg)                     | 92.2830(10)                         | 88.856(3)                                      | 105.364(3)                         | 90.00                                          |
| <i>γ</i> (deg)                     | 90.00                               | 66.3290(10)                                    | 90.00                              | 90.00                                          |
| Volume [Å <sup>3</sup> ]           | 7586.7(11)                          | 4727.7(7)                                      | 3991.5(6)                          | 17031(2)                                       |
| Temperature [K]                    | 298                                 | 298                                            | 298                                | 298                                            |
| <i>Z</i>                           | 4                                   | 4                                              | 4                                  | 8                                              |
| Absorption                         |                                     |                                                |                                    |                                                |
| Coefficient<br>(mm <sup>-1</sup> ) | 1.223                               | 0.234                                          | 0.071                              | 0.162                                          |
| <i>F</i> (000)                     | 3048                                | 1776                                           | 1480                               | 6512                                           |
| crystal size                       | 0.41×0.20<br>×0.13                  | 0.38×0.30<br>×0.18                             | 0.37×0.30<br>×0.06                 | 0.40×0.30<br>×0.10                             |

**Table S2** Optimized structures, Z-matrices (in Å) of the ground states and their corresponding total SCF (ESCF) and zero-point (EZP) energies (in Hartree). There are no imaginary frequencies for six compounds.

|      | <b>3a</b> | <b>3b</b> | <b>3c</b> | <b>5a</b> | <b>5b</b> | <b>D5c</b> |
|------|-----------|-----------|-----------|-----------|-----------|------------|
| HOMO | -1.8 eV   | -1.7 eV   | -1.72 eV  | -5.16 eV  | -5.01 eV  | -4.84 eV   |
| LUMO | -5.16 eV  | -5.01 eV  | -4.84 eV  | -1.81 eV  | -1.67 eV  | -1.68 eV   |

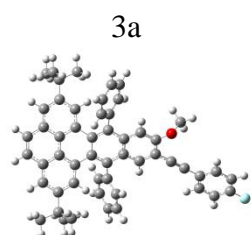

optimized structure

|   |          |          |          |
|---|----------|----------|----------|
| C | -5.82213 | -1.13347 | 0.95082  |
| C | -5.37384 | 0.14098  | 0.57059  |
| C | -3.99395 | 0.34164  | 0.27783  |
| C | -3.11187 | -0.7697  | 0.26654  |
| C | -3.60317 | -2.00405 | 0.71606  |
| C | -4.94627 | -2.20994 | 1.07481  |
| C | -6.27598 | 1.25348  | 0.46842  |
| C | -5.8307  | 2.48569  | 0.10573  |
| C | -4.43683 | 2.73101  | -0.13887 |
| C | -3.51146 | 1.65852  | -0.01013 |
| C | -3.97746 | 4.01087  | -0.49897 |
| C | -2.63055 | 4.25575  | -0.73385 |
| C | -1.72473 | 3.193    | -0.53969 |
| C | -2.11666 | 1.90716  | -0.15132 |
| C | -1.16124 | 0.77941  | -0.00565 |
| C | -1.69623 | -0.56396 | -0.1153  |
| C | 0.22436  | 0.94341  | 0.1553   |
| C | 1.0997   | -0.16832 | -0.0658  |
| C | 0.56061  | -1.40658 | -0.55121 |
| C | -0.85187 | -1.61132 | -0.52459 |
| C | 2.50462  | -0.07506 | 0.1204   |
| C | 3.37759  | -1.08647 | -0.25652 |
| C | 2.83081  | -2.26546 | -0.86002 |
| C | 1.47301  | -2.40874 | -0.99233 |
| C | -5.47181 | -3.57823 | 1.55304  |

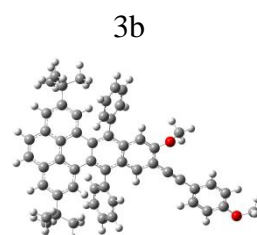

optimized structure

|   |          |          |          |
|---|----------|----------|----------|
| C | -6.03277 | -1.23876 | 1.02155  |
| C | -5.60963 | 0.04597  | 0.65164  |
| C | -4.24299 | 0.26577  | 0.31449  |
| C | -3.34712 | -0.8343  | 0.25811  |
| C | -3.81559 | -2.08464 | 0.6919   |
| C | -5.14431 | -2.31068 | 1.08725  |
| C | -6.52769 | 1.15081  | 0.60197  |
| C | -6.11362 | 2.39257  | 0.23795  |
| C | -4.73367 | 2.65691  | -0.06508 |
| C | -3.79032 | 1.59277  | 0.0206   |
| C | -4.30062 | 3.93687  | -0.44062 |
| C | -2.96733 | 4.19412  | -0.75495 |
| C | -2.04499 | 3.14522  | -0.60289 |
| C | -2.41002 | 1.85963  | -0.17453 |
| C | -1.43302 | 0.75368  | -0.0338  |
| C | -1.93928 | -0.60037 | -0.13963 |
| C | -0.05251 | 0.9539   | 0.13227  |
| C | 0.84979  | -0.13567 | -0.08635 |
| C | 0.33918  | -1.38481 | -0.57628 |
| C | -1.06799 | -1.62573 | -0.54979 |
| C | 2.25144  | -0.01198 | 0.10668  |
| C | 3.14971  | -1.00075 | -0.2715  |
| C | 2.63032  | -2.1887  | -0.88268 |
| C | 1.2766   | -2.36309 | -1.019   |
| C | -5.64513 | -3.68887 | 1.56299  |

|   |          |          |          |   |          |          |          |
|---|----------|----------|----------|---|----------|----------|----------|
| C | -6.28252 | -3.40833 | 2.85928  | C | -6.30874 | -3.55149 | 2.95377  |
| C | -4.33656 | -4.58179 | 1.83104  | C | -4.50986 | -4.72267 | 1.6797   |
| C | -6.38681 | -4.16992 | 0.45417  | C | -6.68461 | -4.22378 | 0.54909  |
| C | -2.1022  | 5.63405  | -1.17609 | C | -2.54947 | 5.60157  | -1.22578 |
| C | -1.25814 | 5.48492  | -2.46401 | C | -1.078   | 5.66164  | -1.67613 |
| C | -1.22083 | 6.22806  | -0.05249 | C | -2.74029 | 6.59796  | -0.05719 |
| C | -3.24252 | 6.62767  | -1.46969 | C | -3.42922 | 6.0381   | -2.42089 |
| C | 4.78131  | -0.93034 | -0.08999 | C | 4.54868  | -0.8142  | -0.09935 |
| C | 5.979    | -0.77514 | 0.05979  | C | 5.74284  | -0.63374 | 0.0544   |
| C | 7.38132  | -0.59453 | 0.2266   | C | 7.13913  | -0.4222  | 0.22798  |
| C | 7.88249  | 0.47656  | 0.99497  | C | 7.61946  | 0.65733  | 1.00277  |
| C | 9.25187  | 0.6559   | 1.16005  | C | 8.97831  | 0.8626   | 1.17149  |
| C | 10.12362 | -0.24178 | 0.55248  | C | 9.9059   | -0.00402 | 0.57101  |
| C | 9.66792  | -1.30993 | -0.21329 | C | 9.44958  | -1.07982 | -0.20171 |
| C | 8.29727  | -1.48307 | -0.37401 | C | 8.08081  | -1.28048 | -0.36685 |
| F | 11.45212 | -0.07091 | 0.71044  | C | -1.5659  | -2.94477 | -1.05436 |
| C | -1.38616 | -2.91653 | -1.02873 | C | -1.18943 | -4.16297 | -0.46416 |
| C | -1.04468 | -4.14463 | -0.43783 | C | -1.63203 | -5.37896 | -0.98603 |
| C | -1.5272  | -5.34748 | -0.95513 | C | -2.45796 | -5.4013  | -2.11147 |
| C | -2.35848 | -5.34649 | -2.07682 | C | -2.83609 | -4.19812 | -2.71061 |
| C | -2.70038 | -4.13344 | -2.6778  | C | -2.39284 | -2.98375 | -2.18845 |
| C | -2.217   | -2.9324  | -2.16045 | C | 0.51439  | 2.25199  | 0.61695  |
| C | 0.83889  | 2.22258  | 0.63347  | C | 0.13427  | 2.74674  | 1.87486  |
| C | 0.53203  | 2.70146  | 1.91649  | C | 0.6753   | 3.93185  | 2.37145  |
| C | 1.13777  | 3.85556  | 2.41287  | C | 1.61237  | 4.64588  | 1.62195  |
| C | 2.0628   | 4.5548   | 1.63542  | C | 2.00473  | 4.16345  | 0.3719   |
| C | 2.37706  | 4.09092  | 0.35623  | C | 1.46229  | 2.97745  | -0.12458 |
| C | 1.77412  | 2.93384  | -0.13794 | O | 3.48389  | -3.14817 | -1.3756  |
| O | 3.66302  | -3.24543 | -1.34838 | C | 4.04953  | -4.01833 | -0.39322 |
| C | 4.1953   | -4.13358 | -0.36325 | O | 11.21784 | 0.28591  | 0.79929  |
| H | -6.87928 | -1.25593 | 1.16847  | C | 12.205   | -0.55217 | 0.21692  |
| H | -2.91547 | -2.82913 | 0.80142  | H | -7.07976 | -1.37596 | 1.27698  |
| H | -7.32916 | 1.08439  | 0.67669  | H | -3.11948 | -2.9056  | 0.73882  |
| H | -6.52322 | 3.31806  | 0.01186  | H | -7.56964 | 0.96526  | 0.84925  |
| H | -4.7132  | 4.80056  | -0.60229 | H | -6.81967 | 3.21697  | 0.18224  |
| H | -0.67866 | 3.38352  | -0.71965 | H | -5.04279 | 4.7279   | -0.49975 |
| H | 2.92571  | 0.82294  | 0.55132  | H | -1.01111 | 3.33144  | -0.84147 |
| H | 1.10598  | -3.32027 | -1.4448  | H | 2.65015  | 0.89315  | 0.54401  |
| H | -7.15345 | -2.76086 | 2.72553  | H | 0.93291  | -3.28134 | -1.47614 |
| H | -6.64751 | -4.38142 | 3.20637  | H | -7.1631  | -2.86871 | 2.93812  |

|         |                |          |          |         |                |          |          |
|---------|----------------|----------|----------|---------|----------------|----------|----------|
| H       | -5.66329       | -2.9762  | 3.6521   | H       | -6.67056       | -4.5266  | 3.29868  |
| H       | -3.64175       | -4.20696 | 2.59038  | H       | -5.59403       | -3.1743  | 3.6925   |
| H       | -4.76167       | -5.51909 | 2.20479  | H       | -3.73909       | -4.39916 | 2.38725  |
| H       | -3.76399       | -4.81732 | 0.92976  | H       | -4.91563       | -5.67201 | 2.04494  |
| H       | -5.8295        | -4.31699 | -0.47655 | H       | -4.02972       | -4.91693 | 0.71662  |
| H       | -6.7881        | -5.14015 | 0.76923  | H       | -6.23578       | -4.34093 | -0.44255 |
| H       | -7.23307       | -3.51037 | 0.23807  | H       | -7.06454       | -5.20078 | 0.8693   |
| H       | -1.85278       | 5.05437  | -3.27634 | H       | -7.53991       | -3.54837 | 0.45135  |
| H       | -0.89412       | 6.46502  | -2.79223 | H       | -0.87872       | 4.96978  | -2.50139 |
| H       | -0.38476       | 4.84512  | -2.31125 | H       | -0.84442       | 6.67197  | -2.02804 |
| H       | -1.80091       | 6.36343  | 0.86642  | H       | -0.38736       | 5.42932  | -0.86093 |
| H       | -0.37028       | 5.58294  | 0.18135  | H       | -3.77962       | 6.62621  | 0.28422  |
| H       | -0.82908       | 7.20684  | -0.35327 | H       | -2.11433       | 6.31926  | 0.79665  |
| H       | -3.90864       | 6.26374  | -2.25903 | H       | -2.46144       | 7.61136  | -0.36835 |
| H       | -3.84612       | 6.83245  | -0.57959 | H       | -4.49034       | 6.08124  | -2.15962 |
| H       | -2.82087       | 7.58094  | -1.80402 | H       | -3.13342       | 7.03583  | -2.76404 |
| H       | 7.18555        | 1.16494  | 1.46077  | H       | -3.32015       | 5.3447   | -3.26121 |
| H       | 9.65063        | 1.47497  | 1.74832  | H       | 6.90795        | 1.33036  | 1.46975  |
| H       | 10.38323       | -1.98465 | -0.67049 | H       | 9.3528         | 1.68953  | 1.76552  |
| H       | 7.92075        | -2.30715 | -0.97035 | H       | 10.14567       | -1.76073 | -0.67637 |
| H       | -0.40544       | -4.15306 | 0.44006  | H       | 7.73023        | -2.11235 | -0.96896 |
| H       | -1.25394       | -6.28534 | -0.47996 | H       | -0.55255       | -4.15307 | 0.41535  |
| H       | -2.7322        | -6.28247 | -2.48136 | H       | -1.33186       | -6.30895 | -0.51162 |
| H       | -3.34006       | -4.1217  | -3.55557 | H       | -2.80023       | -6.3476  | -2.51989 |
| H       | -2.48319       | -1.99172 | -2.63217 | H       | -3.4728        | -4.20441 | -3.59063 |
| H       | -0.18386       | 2.15837  | 2.52559  | H       | -2.68586       | -2.05062 | -2.65933 |
| H       | 0.88961        | 4.2061   | 3.41052  | H       | -0.59161       | 2.1931   | 2.46209  |
| H       | 2.53566        | 5.45242  | 2.02274  | H       | 0.36883        | 4.29464  | 3.34838  |
| H       | 3.09448        | 4.62758  | -0.25789 | H       | 2.03603        | 5.56753  | 2.00996  |
| H       | 2.02474        | 2.57589  | -1.1322  | H       | 2.73345        | 4.70995  | -0.21986 |
| H       | 4.82557        | -4.84524 | -0.9002  | H       | 1.76717        | 2.61173  | -1.10051 |
| H       | 4.80164        | -3.59942 | 0.37656  | H       | 4.69533        | -4.71292 | -0.93424 |
| H       | 3.39129        | -4.67683 | 0.15015  | H       | 4.64652        | -3.46571 | 0.34033  |
| E(SCF)= | -2220.67398488 | a.u.     |          | H       | 3.26549        | -4.58355 | 0.12755  |
| E(ZP)=  | -2219.872444   | a.u.     |          | H       | 13.16734       | -0.1422  | 0.526    |
|         |                |          |          | H       | 12.12092       | -1.58574 | 0.5758   |
|         |                |          |          | H       | 12.14525       | -0.54633 | -0.87871 |
|         |                |          |          | E(SCF)= | -2235.96773421 | a.u.     |          |
|         |                |          |          | E(ZP)=  | -2235.125339   | a.u.     |          |

3c

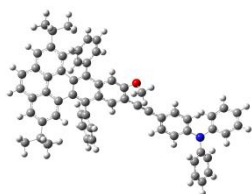

optimized structure

|   |          |          |          |
|---|----------|----------|----------|
| C | -7.9596  | -1.29374 | 1.32269  |
| C | -7.57412 | 0.00418  | 0.95339  |
| C | -6.23397 | 0.2461   | 0.53451  |
| C | -5.33757 | -0.84438 | 0.38902  |
| C | -5.7605  | -2.10681 | 0.83041  |
| C | -7.05697 | -2.35518 | 1.31246  |
| C | -8.50138 | 1.10023  | 0.98644  |
| C | -8.11698 | 2.35494  | 0.63101  |
| C | -6.75914 | 2.63997  | 0.25953  |
| C | -5.80661 | 1.58367  | 0.25473  |
| C | -6.36055 | 3.94133  | -0.09627 |
| C | -5.04827 | 4.2226   | -0.45518 |
| C | -4.10845 | 3.17387  | -0.38976 |
| C | -4.43736 | 1.86761  | -0.01161 |
| C | -3.45214 | 0.75719  | -0.00111 |
| C | -3.96962 | -0.59179 | -0.11793 |
| C | -2.06111 | 0.9468   | 0.04013  |
| C | -1.18914 | -0.13378 | -0.30854 |
| C | -1.74756 | -1.3619  | -0.79753 |
| C | -3.14676 | -1.60133 | -0.64875 |
| C | 0.22484  | -0.02596 | -0.22771 |
| C | 1.07983  | -1.00226 | -0.72177 |
| C | 0.50031  | -2.14998 | -1.35777 |
| C | -0.86127 | -2.31397 | -1.3806  |
| C | -7.50727 | -3.75128 | 1.78633  |
| C | -8.16457 | -3.64921 | 3.18273  |
| C | -6.33484 | -4.74499 | 1.8905   |
| C | -8.53525 | -4.3131  | 0.77513  |
| C | -4.59312 | 5.62383  | -0.90593 |
| C | -3.58707 | 6.1938   | 0.12124  |
| C | -5.77272 | 6.60816  | -1.02229 |
| C | -3.91317 | 5.53094  | -2.2925  |
| C | 2.48749  | -0.87273 | -0.57504 |

5a

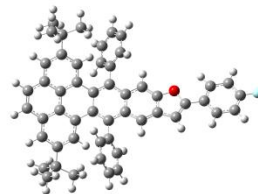

optimized structure

|   |          |          |          |
|---|----------|----------|----------|
| C | -4.71891 | 3.09026  | 0.6268   |
| C | -4.84489 | 1.73442  | 0.28975  |
| C | -3.67424 | 0.94328  | 0.10904  |
| C | -2.39503 | 1.55568  | 0.17174  |
| C | -2.33124 | 2.90136  | 0.56513  |
| C | -3.47182 | 3.68459  | 0.8096   |
| C | -6.13428 | 1.12289  | 0.11881  |
| C | -6.25118 | -0.18916 | -0.21433 |
| C | -5.09104 | -1.02481 | -0.36163 |
| C | -3.80037 | -0.46052 | -0.15041 |
| C | -5.20576 | -2.3795  | -0.70667 |
| C | -4.08326 | -3.189   | -0.86989 |
| C | -2.82517 | -2.62782 | -0.5928  |
| C | -2.65332 | -1.29576 | -0.18665 |
| C | -1.32126 | -0.70625 | 0.09212  |
| C | -1.18571 | 0.73057  | -0.06069 |
| C | -0.19177 | -1.46351 | 0.43029  |
| C | 1.1164   | -0.87649 | 0.34872  |
| C | 1.24851  | 0.4547   | -0.20356 |
| C | 0.07774  | 1.26751  | -0.34905 |
| C | 2.28139  | -1.59111 | 0.73822  |
| C | 3.53436  | -1.06507 | 0.47786  |
| C | 3.62648  | 0.18597  | -0.18518 |
| C | 2.54516  | 0.94915  | -0.52742 |
| C | -3.38435 | 5.1619   | 1.24168  |
| C | -1.94112 | 5.60484  | 1.54644  |
| C | -4.22764 | 5.38668  | 2.51893  |
| C | -3.93422 | 6.05062  | 0.10052  |
| C | -4.2568  | -4.65412 | -1.31739 |
| C | -2.91177 | -5.35664 | -1.58029 |
| C | -5.08264 | -4.70794 | -2.6243  |
| C | -5.00241 | -5.43274 | -0.20736 |
| C | 4.89487  | -1.48657 | 0.68395  |

|   |          |          |          |   |          |          |          |
|---|----------|----------|----------|---|----------|----------|----------|
| C | 3.68979  | -0.74162 | -0.43159 | C | 5.69624  | -0.51819 | 0.15034  |
| C | 5.09237  | -0.5951  | -0.25342 | O | 4.94362  | 0.51259  | -0.38967 |
| C | 5.63603  | 0.58673  | 0.29097  | C | 7.14259  | -0.376   | 0.04542  |
| C | 7.00367  | 0.72695  | 0.4772   | C | 7.70846  | 0.72478  | -0.62294 |
| C | 7.8881   | -0.30498 | 0.11285  | C | 9.08949  | 0.86367  | -0.72771 |
| C | 7.35296  | -1.48343 | -0.43956 | C | 9.90647  | -0.10607 | -0.15912 |
| C | 5.98382  | -1.62753 | -0.61156 | C | 9.38251  | -1.20791 | 0.51072  |
| N | 9.28289  | -0.16119 | 0.29863  | C | 8.0022   | -1.33667 | 0.61025  |
| C | 10.07484 | -1.2763  | 0.69455  | C | -0.3014  | -2.8588  | 0.96324  |
| C | 9.90708  | 1.10308  | 0.09937  | C | 0.31867  | -3.95195 | 0.33426  |
| C | 11.31711 | -1.51484 | 0.0864   | C | 0.23002  | -5.23502 | 0.87534  |
| C | 12.09663 | -2.59899 | 0.48461  | C | -0.47745 | -5.45077 | 2.05982  |
| C | 11.64631 | -3.47009 | 1.47844  | C | -1.09278 | -4.37255 | 2.69858  |
| C | 10.40746 | -3.23893 | 2.07968  | C | -1.00296 | -3.09074 | 2.15706  |
| C | 9.62894  | -2.14706 | 1.70139  | C | 0.24795  | 2.65134  | -0.89612 |
| C | 10.85766 | 1.57776  | 1.01633  | C | 1.02746  | 3.62529  | -0.24896 |
| C | 11.4769  | 2.8091   | 0.81114  | C | 1.20009  | 4.89239  | -0.80748 |
| C | 11.14839 | 3.59299  | -0.29658 | C | 0.59907  | 5.21044  | -2.027   |
| C | 10.19726 | 3.12628  | -1.20606 | C | -0.17405 | 4.25074  | -2.68309 |
| C | 9.58607  | 1.88815  | -1.01923 | C | -0.34497 | 2.98467  | -2.12451 |
| C | -3.6996  | -2.89806 | -1.15337 | F | 11.24504 | 0.02264  | -0.25687 |
| C | -3.26339 | -4.13933 | -0.66011 | H | -5.62909 | 3.66805  | 0.76129  |
| C | -3.76775 | -5.33317 | -1.17773 | H | -1.36148 | 3.35053  | 0.70142  |
| C | -4.71688 | -5.3096  | -2.20136 | H | -7.01832 | 1.74177  | 0.24803  |
| C | -5.1543  | -4.08288 | -2.70502 | H | -7.2302  | -0.63714 | -0.36314 |
| C | -4.6486  | -2.89095 | -2.18839 | H | -6.20243 | -2.78168 | -0.86576 |
| C | -1.43172 | 2.2181   | 0.51883  | H | -1.9501  | -3.24505 | -0.71292 |
| C | -1.64511 | 2.64296  | 1.83955  | H | 2.18565  | -2.55496 | 1.21989  |
| C | -1.01973 | 3.78769  | 2.33281  | H | 2.67617  | 1.91033  | -1.00407 |
| C | -0.1684  | 4.53244  | 1.51447  | H | -1.49285 | 5.00239  | 2.34373  |
| C | 0.05121  | 4.12371  | 0.19736  | H | -1.94199 | 6.64761  | 1.88079  |
| C | -0.57115 | 2.97579  | -0.294   | H | -1.29509 | 5.54135  | 0.66653  |
| O | 1.29727  | -3.13733 | -1.88624 | H | -4.16594 | 6.43461  | 2.83327  |
| C | 1.94603  | -2.80439 | -3.11604 | H | -3.86399 | 4.76378  | 3.34269  |
| H | -8.98688 | -1.44821 | 1.6405   | H | -5.28442 | 5.15138  | 2.3644   |
| H | -5.05392 | -2.92037 | 0.81105  | H | -3.34437 | 5.91924  | -0.81233 |
| H | -9.52538 | 0.90034  | 1.29092  | H | -3.89302 | 7.10868  | 0.38405  |
| H | -8.83054 | 3.17472  | 0.63948  | H | -4.9747  | 5.80688  | -0.13491 |
| H | -7.1164  | 4.71891  | -0.09752 | H | -3.09502 | -6.38061 | -1.92251 |
| H | -3.08843 | 3.3915   | -0.66547 | H | -2.29379 | -5.41604 | -0.68005 |

|   |          |          |          |   |          |          |                                        |
|---|----------|----------|----------|---|----------|----------|----------------------------------------|
| H | 0.66564  | 0.84604  | 0.23605  | H | -2.33446 | -4.84691 | -2.35902                               |
| H | -1.24904 | -3.21304 | -1.84063 | H | -6.07855 | -4.27292 | -2.50149                               |
| H | -9.04854 | -3.00518 | 3.17982  | H | -5.21356 | -5.74678 | -2.94741                               |
| H | -8.48157 | -4.64107 | 3.52349  | H | -4.57767 | -4.1637  | -3.42906                               |
| H | -7.46058 | -3.24703 | 3.91856  | H | -4.42971 | -5.42273 | 0.72562                                |
| H | -5.56411 | -4.38788 | 2.58186  | H | -5.15133 | -6.47702 | -0.50528                               |
| H | -6.70071 | -5.70494 | 2.26982  | H | -5.986   | -4.99962 | -0.00105                               |
| H | -5.86446 | -4.93253 | 0.92134  | H | 5.22498  | -2.39839 | 1.1593                                 |
| H | -8.08902 | -4.40757 | -0.22011 | H | 7.0566   | 1.4712   | -1.06111                               |
| H | -8.88142 | -5.3044  | 1.08989  | H | 9.53668  | 1.7077   | -1.24105                               |
| H | -9.41163 | -3.66313 | 0.68915  | H | 10.05393 | -1.94159 | 0.94277                                |
| H | -4.04845 | 6.28224  | 1.11043  | H | 7.58864  | -2.19148 | 1.13528                                |
| H | -2.70297 | 5.5595   | 0.22153  | H | 0.86473  | -3.79304 | -0.59088                               |
| H | -3.25253 | 7.19122  | -0.18725 | H | 0.71245  | -6.06647 | 0.36923                                |
| H | -6.26672 | 6.76981  | -0.05868 | H | -0.54513 | -6.44892 | 2.48241                                |
| H | -5.40824 | 7.58036  | -1.36954 | H | -1.63971 | -4.52771 | 3.62417                                |
| H | -6.52413 | 6.25995  | -1.73863 | H | -1.48062 | -2.25453 | 2.65796                                |
| H | -4.60261 | 5.12713  | -3.04117 | H | 1.49132  | 3.38842  | 0.70398                                |
| H | -3.59573 | 6.52578  | -2.62453 | H | 1.80322  | 5.63131  | -0.28762                               |
| H | -3.02619 | 4.89149  | -2.27377 | H | 0.73505  | 6.19571  | -2.46312                               |
| H | 4.96747  | 1.39001  | 0.58315  | H | -0.64046 | 4.48553  | -3.63558                               |
| H | 7.39801  | 1.63861  | 0.91216  | H | -0.94373 | 2.24004  | -2.63957                               |
| H | 8.02075  | -2.28561 | -0.73343 |   |          |          | $E_{(\text{SCF})}=-2181.42744271$ a.u. |
| H | 5.58751  | -2.5432  | -1.03819 |   |          |          | $E_{(\text{ZP})}=-2195.904836$ a.u.    |
| H | 11.66417 | -0.8475  | -0.69534 |   |          |          |                                        |
| H | 13.05566 | -2.76986 | 0.00404  |   |          |          |                                        |
| H | 12.2531  | -4.31788 | 1.78101  |   |          |          |                                        |
| H | 10.04805 | -3.90359 | 2.85998  |   |          |          |                                        |
| H | 8.67353  | -1.96281 | 2.18115  |   |          |          |                                        |
| H | 11.10559 | 0.97685  | 1.88489  |   |          |          |                                        |
| H | 12.21042 | 3.16224  | 1.53025  |   |          |          |                                        |
| H | 11.62778 | 4.55492  | -0.44946 |   |          |          |                                        |
| H | 9.93808  | 3.72169  | -2.07682 |   |          |          |                                        |
| H | 8.85855  | 1.52253  | -1.73622 |   |          |          |                                        |
| H | -2.53047 | -4.1659  | 0.14056  |   |          |          |                                        |
| H | -3.41822 | -6.28138 | -0.77945 |   |          |          |                                        |
| H | -5.10812 | -6.23842 | -2.60595 |   |          |          |                                        |
| H | -5.88632 | -4.05326 | -3.50703 |   |          |          |                                        |
| H | -4.9894  | -1.93963 | -2.58488 |   |          |          |                                        |
| H | -2.30282 | 2.0638   | 2.48016  |   |          |          |                                        |



|   |          |          |          |
|---|----------|----------|----------|
| H | -1.1941  | 4.09499  | 3.35991  |
| H | 0.32036  | 5.4226   | 1.8993   |
| H | 0.71044  | 4.69641  | -0.44871 |
| H | -0.39345 | 2.66106  | -1.31811 |
| H | 2.53463  | -3.67973 | -3.3977  |
| H | 1.20887  | -2.59484 | -3.90181 |
| H | 2.61187  | -1.94247 | -3.00202 |

$E(\text{SCF}) = -2638.90688740 \text{ a.u.}$   
 $E(\text{ZP}) = -2637.919371 \text{ a.u.}$

5b

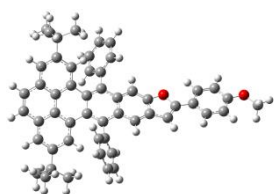

D5c

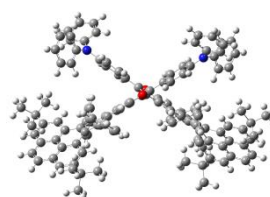

optimized structure

|   |          |          |          |
|---|----------|----------|----------|
| C | -5.03052 | 3.02655  | 0.64462  |
| C | -5.13597 | 1.6686   | 0.30898  |
| C | -3.95354 | 0.89693  | 0.12062  |
| C | -2.684   | 1.53021  | 0.17493  |
| C | -2.64035 | 2.87704  | 0.56736  |
| C | -3.79219 | 3.64139  | 0.81881  |
| C | -6.41604 | 1.03543  | 0.1468   |
| C | -6.5134  | -0.27841 | -0.18572 |
| C | -5.34058 | -1.09458 | -0.34153 |
| C | -4.05822 | -0.50869 | -0.13843 |
| C | -5.43488 | -2.45068 | -0.68748 |
| C | -4.29983 | -3.24035 | -0.86083 |
| C | -3.04966 | -2.65822 | -0.59135 |
| C | -2.89754 | -1.32445 | -0.18314 |
| C | -1.5739  | -0.71357 | 0.08918  |
| C | -1.46262 | 0.72493  | -0.06398 |
| C | -0.43061 | -1.45309 | 0.42072  |
| C | 0.86757  | -0.84538 | 0.33494  |
| C | 0.97555  | 0.48828  | -0.21639 |
| C | -0.20867 | 1.28193  | -0.35671 |
| C | 2.04582  | -1.54142 | 0.71917  |

optimized structure

|   |          |          |         |
|---|----------|----------|---------|
| C | 8.57396  | -3.46471 | 5.03863 |
| C | 8.84378  | -2.23529 | 4.41923 |
| C | 7.92687  | -1.71346 | 3.4624  |
| C | 6.80367  | -2.48819 | 3.07056 |
| C | 6.5544   | -3.68005 | 3.76813 |
| C | 7.41296  | -4.18337 | 4.76026 |
| C | 10.03117 | -1.48704 | 4.72879 |
| C | 10.28842 | -0.29669 | 4.12632 |
| C | 9.3607   | 0.2796   | 3.19195 |
| C | 8.15387  | -0.41699 | 2.89546 |
| C | 9.61861  | 1.51178  | 2.57353 |
| C | 8.73104  | 2.067    | 1.65383 |
| C | 7.52166  | 1.39071  | 1.42003 |
| C | 7.1815   | 0.18601  | 2.05508 |
| C | 5.90758  | -0.52782 | 1.79427 |
| C | 5.88643  | -1.95871 | 2.03354 |
| C | 4.76242  | 0.09196  | 1.27402 |
| C | 3.70784  | -0.70588 | 0.7135  |
| C | 3.89731  | -2.137   | 0.6073  |
| C | 4.96889  | -2.75362 | 1.33098 |
| C | 2.51853  | -0.11894 | 0.20127 |

|   |          |          |          |   |          |          |          |
|---|----------|----------|----------|---|----------|----------|----------|
| C | 3.28946  | -0.99486 | 0.45618  | C | 1.61624  | -0.89331 | -0.50254 |
| C | 3.35827  | 0.25887  | -0.20563 | C | 1.8858   | -2.26951 | -0.68394 |
| C | 2.26337  | 1.00407  | -0.54362 | C | 2.97637  | -2.90722 | -0.16089 |
| C | -3.72589 | 5.12049  | 1.24887  | C | 7.13009  | -5.50304 | 5.50538  |
| C | -2.28854 | 5.58545  | 1.54846  | C | 5.71284  | -6.04259 | 5.23446  |
| C | -4.56825 | 5.33452  | 2.52853  | C | 7.27027  | -5.2927  | 7.03137  |
| C | -4.29262 | 5.99937  | 0.10834  | C | 8.15383  | -6.56557 | 5.03868  |
| C | -4.45043 | -4.70798 | -1.30863 | C | 9.08315  | 3.39884  | 0.96155  |
| C | -3.09571 | -5.38099 | -1.59853 | C | 8.07096  | 3.78483  | -0.13317 |
| C | -5.29895 | -4.77821 | -2.60007 | C | 10.47845 | 3.29749  | 0.30171  |
| C | -5.15824 | -5.50391 | -0.18619 | C | 9.09861  | 4.52436  | 2.02371  |
| C | 4.65716  | -1.39288 | 0.65779  | C | -0.02825 | -1.84846 | -1.72265 |
| C | 5.44173  | -0.40983 | 0.12375  | O | 0.88809  | -2.84696 | -1.42425 |
| O | 4.66844  | 0.60832  | -0.41311 | C | -1.15916 | -2.28124 | -2.53144 |
| C | 6.88329  | -0.24073 | 0.01646  | C | -1.4271  | -3.65361 | -2.70177 |
| C | 7.43544  | 0.86717  | -0.65738 | C | -2.50374 | -4.08984 | -3.46129 |
| C | 8.8079   | 1.0265   | -0.7608  | C | -3.35376 | -3.16849 | -4.10252 |
| C | 9.6765   | 0.08234  | -0.19273 | C | -3.07961 | -1.79589 | -3.94946 |
| C | 9.14495  | -1.02524 | 0.48236  | C | -2.01052 | -1.36417 | -3.17768 |
| C | 7.7644   | -1.1756  | 0.58117  | C | 4.55735  | 1.57262  | 1.36119  |
| C | -0.51587 | -2.85098 | 0.95147  | C | 4.32076  | 2.36915  | 0.22772  |
| C | 0.11785  | -3.93303 | 0.31694  | C | 4.0934   | 3.74075  | 0.34905  |
| C | 0.0519   | -5.21855 | 0.8554   | C | 4.09829  | 4.34422  | 1.60807  |
| C | -0.6459  | -5.44804 | 2.04307  | C | 4.32668  | 3.56427  | 2.74355  |
| C | -1.27436 | -4.38089 | 2.68755  | C | 4.5499   | 2.19365  | 2.62094  |
| C | -1.20726 | -3.09661 | 2.14852  | C | 5.11848  | -4.24058 | 1.2286   |
| O | 11.00707 | 0.32966  | -0.34899 | C | 6.26914  | -4.78064 | 0.63228  |
| C | 11.93446 | -0.59332 | 0.20284  | C | 6.42062  | -6.15893 | 0.48435  |
| C | -0.06266 | 2.66862  | -0.90373 | C | 5.42067  | -7.02784 | 0.92534  |
| C | -0.66418 | 2.99263  | -2.13045 | C | 4.26758  | -6.50578 | 1.51493  |
| C | -0.51474 | 4.26126  | -2.68944 | C | 4.11795  | -5.12636 | 1.66341  |
| C | 0.24495  | 5.23303  | -2.03546 | N | -4.44555 | -3.60766 | -4.88148 |
| C | 0.8541   | 4.9245   | -0.81751 | C | -5.64187 | -2.83497 | -4.95346 |
| C | 0.70292  | 3.65487  | -0.25862 | C | -4.3646  | -4.82287 | -5.6218  |
| H | -5.9494  | 3.58907  | 0.78472  | C | -3.22552 | -5.12058 | -6.38568 |
| H | -1.67725 | 3.3422   | 0.69713  | C | -3.15589 | -6.31182 | -7.10532 |
| H | -7.30944 | 1.63947  | 0.28201  | C | -4.22304 | -7.21221 | -7.09156 |
| H | -7.48589 | -0.74255 | -0.32793 | C | -5.36193 | -6.91211 | -6.34171 |
| H | -6.42579 | -2.86948 | -0.83954 | C | -5.43326 | -5.73185 | -5.60437 |

|   |          |          |          |   |          |          |          |
|---|----------|----------|----------|---|----------|----------|----------|
| H | -2.16481 | -3.25962 | -0.71933 | C | -6.26221 | -2.60797 | -6.19116 |
| H | 1.96734  | -2.50753 | 1.19946  | C | -7.43921 | -1.86491 | -6.25971 |
| H | 2.37756  | 1.96786  | -1.01938 | C | -8.00416 | -1.3227  | -5.10394 |
| H | -1.82853 | 4.99022  | 2.34446  | C | -7.3846  | -1.54142 | -3.87178 |
| H | -2.30397 | 6.62837  | 1.88208  | C | -6.21883 | -2.30067 | -3.79111 |
| H | -1.64479 | 5.53104  | 0.66635  | H | 9.29236  | -3.83665 | 5.76374  |
| H | -4.52123 | 6.38375  | 2.84123  | H | 5.65375  | -4.22687 | 3.5427   |
| H | -4.19254 | 4.71834  | 3.35195  | H | 10.72899 | -1.90426 | 5.45012  |
| H | -5.62189 | 5.08315  | 2.37794  | H | 11.19877 | 0.25234  | 4.35239  |
| H | -3.70287 | 5.87659  | -0.80576 | H | 10.54638 | 2.02042  | 2.82009  |
| H | -4.26774 | 7.05826  | 0.39083  | H | 6.82673  | 1.81178  | 0.71225  |
| H | -5.32958 | 5.73869  | -0.12446 | H | 2.32889  | 0.93655  | 0.33876  |
| H | -3.26373 | -6.40681 | -1.94319 | H | 3.11816  | -3.9684  | -0.30895 |
| H | -2.46088 | -5.43255 | -0.70965 | H | 4.94317  | -5.31865 | 5.5227   |
| H | -2.54281 | -4.85511 | -2.38423 | H | 5.54917  | -6.95172 | 5.82271  |
| H | -5.41258 | -5.81926 | -2.92263 | H | 5.563    | -6.30117 | 4.18282  |
| H | -4.8211  | -4.22172 | -3.41299 | H | 7.06709  | -6.22999 | 7.56117  |
| H | -6.30192 | -4.3659  | -2.4583  | H | 6.56103  | -4.53971 | 7.39025  |
| H | -4.56862 | -5.48204 | 0.73597  | H | 8.27482  | -4.9671  | 7.31505  |
| H | -5.29011 | -6.551   | -0.48249 | H | 8.06129  | -6.74717 | 3.96302  |
| H | -6.14694 | -5.09207 | 0.03881  | H | 7.98786  | -7.51496 | 5.56108  |
| H | 5.00464  | -2.29972 | 1.13021  | H | 9.18193  | -6.24735 | 5.23768  |
| H | 6.77299  | 1.60183  | -1.10024 | H | 8.38199  | 4.72348  | -0.60363 |
| H | 9.23642  | 1.87763  | -1.27928 | H | 7.06525  | 3.93544  | 0.26854  |
| H | 9.79209  | -1.76815 | 0.93251  | H | 8.01597  | 3.02617  | -0.92129 |
| H | 7.37067  | -2.03677 | 1.11204  | H | 10.73461 | 4.24305  | -0.18917 |
| H | 0.65714  | -3.76331 | -0.61022 | H | 10.49642 | 2.50692  | -0.4557  |
| H | 0.54476  | -6.0412  | 0.34491  | H | 11.26575 | 3.07993  | 1.02895  |
| H | -0.69588 | -6.44811 | 2.46367  | H | 8.1151   | 4.62845  | 2.49317  |
| H | -1.81387 | -4.54656 | 3.61571  | H | 9.35975  | 5.48373  | 1.56207  |
| H | -1.69501 | -2.26899 | 2.65396  | H | 9.82764  | 4.32355  | 2.81488  |
| H | 11.82133 | -1.59196 | -0.23755 | H | -0.788   | -4.38174 | -2.21588 |
| H | 11.83146 | -0.66732 | 1.29277  | H | -2.6931  | -5.15261 | -3.56282 |
| H | 12.92459 | -0.20468 | -0.03841 | H | -3.7058  | -1.0667  | -4.45082 |
| H | -1.25232 | 2.23851  | -2.64393 | H | -1.81632 | -0.30149 | -3.09767 |
| H | -0.98732 | 4.48867  | -3.64072 | H | 4.31078  | 1.90876  | -0.75554 |
| H | 0.36438  | 6.22027  | -2.47204 | H | 3.9045   | 4.33133  | -0.54236 |
| H | 1.44719  | 5.67272  | -0.29937 | H | 3.91838  | 5.41102  | 1.704    |
| H | 1.17347  | 3.42499  | 0.69273  | H | 4.32246  | 4.02191  | 3.72873  |

$E_{\text{(SCF)}} = -2181.42744271$  a.u.

$E_{\text{(ZP)}} = -2195.904836$  a.u.

|   |          |          |          |
|---|----------|----------|----------|
| H | 4.72201  | 1.59037  | 3.50674  |
| H | 7.04761  | -4.108   | 0.2861   |
| H | 7.31859  | -6.55406 | 0.01798  |
| H | 5.53667  | -8.10121 | 0.8073   |
| H | 3.48278  | -7.17207 | 1.86168  |
| H | 3.22118  | -4.72803 | 2.12874  |
| H | -2.40092 | -4.41601 | -6.40999 |
| H | -2.26761 | -6.52846 | -7.69167 |
| H | -4.16818 | -8.13583 | -7.65937 |
| H | -6.19723 | -7.60603 | -6.31843 |
| H | -6.31426 | -5.50574 | -5.01304 |
| H | -5.81767 | -3.01662 | -7.09246 |
| H | -7.90796 | -1.69798 | -7.22522 |
| H | -8.91609 | -0.73669 | -5.16221 |
| H | -7.81533 | -1.12955 | -2.9637  |
| H | -5.75301 | -2.48566 | -2.82908 |
| C | -0.36178 | 0.63899  | -1.1868  |
| C | -1.61656 | 0.89285  | -0.50355 |
| C | 0.02802  | 1.84684  | -1.72444 |
| C | -2.51888 | 0.11915  | 0.20095  |
| C | -1.88614 | 2.26886  | -0.6863  |
| O | -0.88837 | 2.84561  | -1.42709 |
| C | 1.15903  | 2.27885  | -2.5335  |
| C | -3.70821 | 0.70658  | 0.71258  |
| H | -2.32927 | -0.93622 | 0.33945  |
| C | -2.97676 | 2.90706  | -0.16396 |
| C | 1.42714  | 3.65105  | -2.7049  |
| C | 2.01035  | 1.36116  | -3.1789  |
| C | -4.76276 | -0.09074 | 1.27389  |
| C | -3.89771 | 2.1376   | 0.60497  |
| H | -3.11857 | 3.96808  | -0.31312 |
| C | 2.50394  | 4.08654  | -3.46462 |
| H | 0.78806  | 4.37965  | -2.21968 |
| C | 3.07959  | 1.79213  | -3.95089 |
| H | 1.81597  | 0.29857  | -3.09806 |
| C | -5.90784 | 0.52953  | 1.79372  |
| C | -4.55773 | -1.57134 | 1.36226  |
| C | -4.96929 | 2.7549   | 1.32807  |
| C | 3.35395  | 3.16457  | -4.10497 |

|   |           |          |          |
|---|-----------|----------|----------|
| H | 2.69345   | 5.14921  | -3.56696 |
| H | 3.70575   | 1.06246  | -4.45158 |
| C | -7.18169  | -0.18406 | 2.05549  |
| C | -5.88668  | 1.96065  | 2.03158  |
| C | -4.32136  | -2.36876 | 0.22936  |
| C | -4.55007  | -2.19137 | 2.62249  |
| C | -5.11915  | 4.24172  | 1.22406  |
| N | 4.44596   | 3.60297  | -4.88406 |
| C | -8.1538   | 0.41965  | 2.89566  |
| C | -7.52203  | -1.38929 | 1.42157  |
| C | -6.8037   | 2.49112  | 3.0683   |
| C | -4.09402  | -3.74028 | 0.35173  |
| H | -4.31151  | -1.90914 | -0.75425 |
| C | -4.32687  | -3.5619  | 2.74613  |
| H | -4.722    | -1.58739 | 3.50785  |
| C | -6.27008  | 4.78087  | 0.62745  |
| C | -4.11866  | 5.1282   | 1.65756  |
| C | 5.64217   | 2.83003  | -4.95525 |
| C | 4.36544   | 4.81772  | -5.62518 |
| C | -7.92668  | 1.71667  | 3.4613   |
| C | -9.36049  | -0.27674 | 3.19319  |
| C | -8.73132  | -2.06541 | 1.65635  |
| H | -6.82733  | -1.81093 | 0.71389  |
| C | -6.55435  | 3.68373  | 3.76455  |
| C | -4.09871  | -4.34275 | 1.61122  |
| H | -3.90527  | -4.33156 | -0.53924 |
| H | -4.32248  | -4.01877 | 3.73168  |
| C | -6.42186  | 6.15896  | 0.47794  |
| H | -7.04852  | 4.10768  | 0.28227  |
| C | -4.26859  | 6.50741  | 1.50748  |
| H | -3.2217   | 4.73059  | 2.12313  |
| C | 6.26271   | 2.60207  | -6.19266 |
| C | 6.21881   | 2.29645  | -3.79241 |
| C | 3.22663   | 5.11516  | -6.38957 |
| C | 5.43427   | 5.72651  | -5.60804 |
| C | -8.8433   | 2.23934  | 4.41796  |
| C | -10.28789 | 0.30034  | 4.12738  |
| C | -9.61857  | -1.50946 | 2.57592  |
| C | -9.08356  | -3.39787 | 0.96531  |

|   |           |          |          |
|---|-----------|----------|----------|
| C | -7.41261  | 4.18796  | 4.75648  |
| H | -5.65387  | 4.23045  | 3.53819  |
| H | -3.91881  | -5.40948 | 1.70796  |
| C | -5.42193  | 7.02857  | 0.91759  |
| H | -7.32004  | 6.55337  | 0.01136  |
| H | -3.48381  | 7.17426  | 1.85322  |
| C | 7.43962   | 1.8588   | -6.26046 |
| H | 5.81842   | 3.01017  | -7.09433 |
| C | 7.38449   | 1.53697  | -3.87232 |
| H | 5.75283   | 2.48217  | -2.8306  |
| C | 3.15743   | 6.30595  | -7.11    |
| H | 2.40191   | 4.41073  | -6.41366 |
| C | 5.36337   | 6.90631  | -6.34616 |
| H | 6.31506   | 5.50062  | -5.01631 |
| C | -8.57339  | 3.46941  | 5.03604  |
| C | -10.0305  | 1.49126  | 4.72866  |
| H | -11.19812 | -0.24854 | 4.3543   |
| H | -10.54622 | -2.01794 | 2.82326  |
| C | -8.07213  | -3.78433 | -0.12994 |
| C | -10.47941 | -3.2975  | 0.3065   |
| C | -9.09779  | -4.52258 | 2.02836  |
| C | -7.1296   | 5.50845  | 5.50008  |
| H | -5.53816  | 8.10178  | 0.79831  |
| C | 8.00426   | 1.3173   | -5.1042  |
| H | 7.90854   | 1.69113  | -7.22576 |
| H | 7.81497   | 1.12566  | -2.96386 |
| C | 4.22476   | 7.20614  | -7.09653 |
| H | 2.26936   | 6.52237  | -7.69675 |
| H | 6.1988    | 7.60008  | -6.32309 |
| H | -9.29158  | 3.84197  | 5.76105  |
| H | -10.7281  | 1.90909  | 5.44986  |
| H | -8.38329  | -4.72335 | -0.59955 |
| H | -7.06606  | -3.93442 | 0.27106  |
| H | -8.01797  | -3.02615 | -0.91858 |
| H | -10.73558 | -4.2435  | -0.18354 |
| H | -10.49827 | -2.50746 | -0.45144 |
| H | -11.26625 | -3.07976 | 1.03417  |
| H | -8.11389  | -4.6259  | 2.49716  |
| H | -9.35889  | -5.48242 | 1.56768  |

|   |          |          |          |
|---|----------|----------|----------|
| H | -9.8263  | -4.3214  | 2.81991  |
| C | -5.71249 | 6.04782  | 5.2281   |
| C | -7.26926 | 5.29974  | 7.02634  |
| C | -8.15359 | 6.57039  | 5.03257  |
| H | 8.91611  | 0.73112  | -5.16188 |
| H | 4.17023  | 8.1294   | -7.66495 |
| H | -4.94267 | 5.32429  | 5.51697  |
| H | -5.54872 | 6.95766  | 5.81522  |
| H | -5.56299 | 6.30516  | 4.1761   |
| H | -7.0659  | 6.2376   | 7.55508  |
| H | -6.5599  | 4.54714  | 7.38578  |
| H | -8.27372 | 4.97444  | 7.3107   |
| H | -8.06141 | 6.75086  | 3.95669  |
| H | -7.98754 | 7.52035  | 5.5539   |
| H | -9.18159 | 6.25228  | 5.23223  |
| C | 0.36152  | -0.64009 | -1.18614 |

$E_{(\text{SCF})} = -5198.12385334$  a.u.

$E_{(\text{ZP})} = -5196.219761$  a.u.

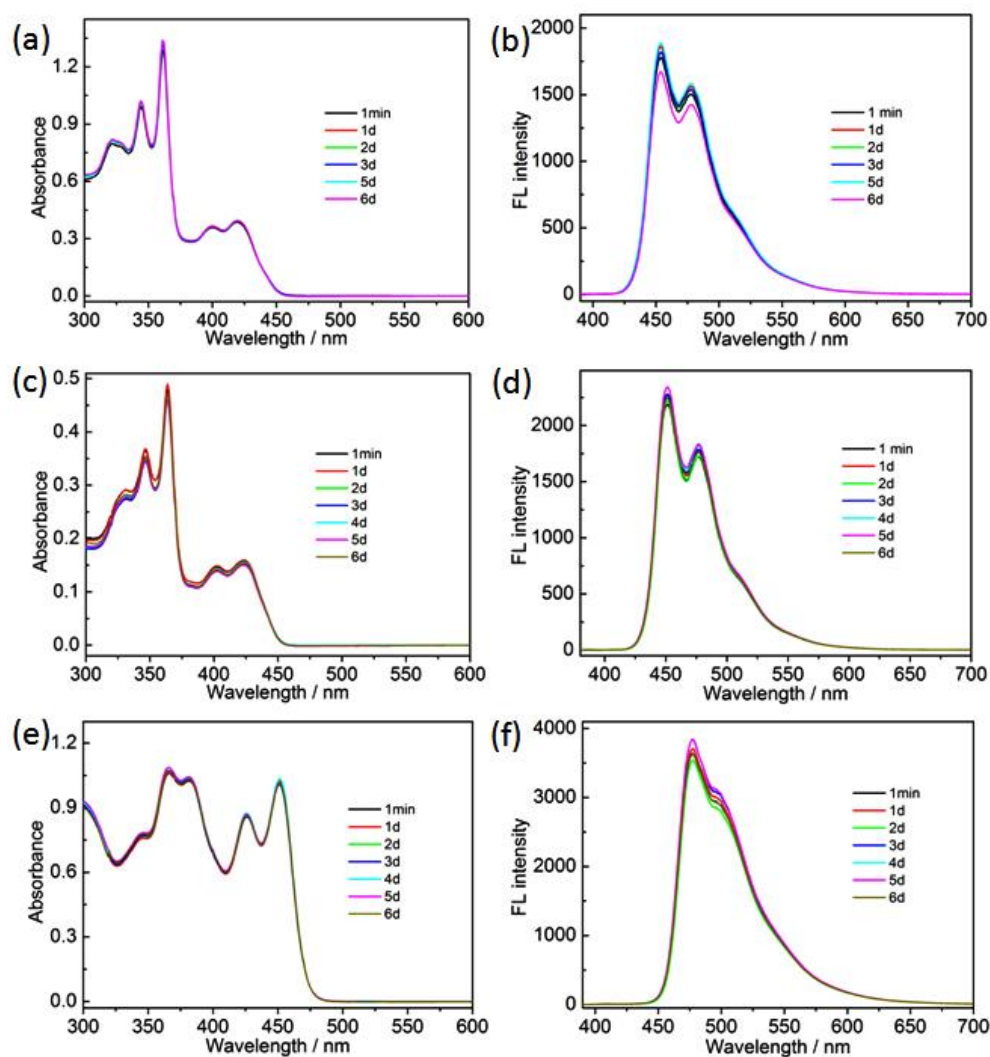

Figure S1 UV-Vis absorption and emission spectra of **5a** (a)/(b), **5b** (c)/(d) and **D5c** (e)/(f) in toluene ( $[c] = 1 \times 10^{-5} \text{M}$ ) in different monitored time.

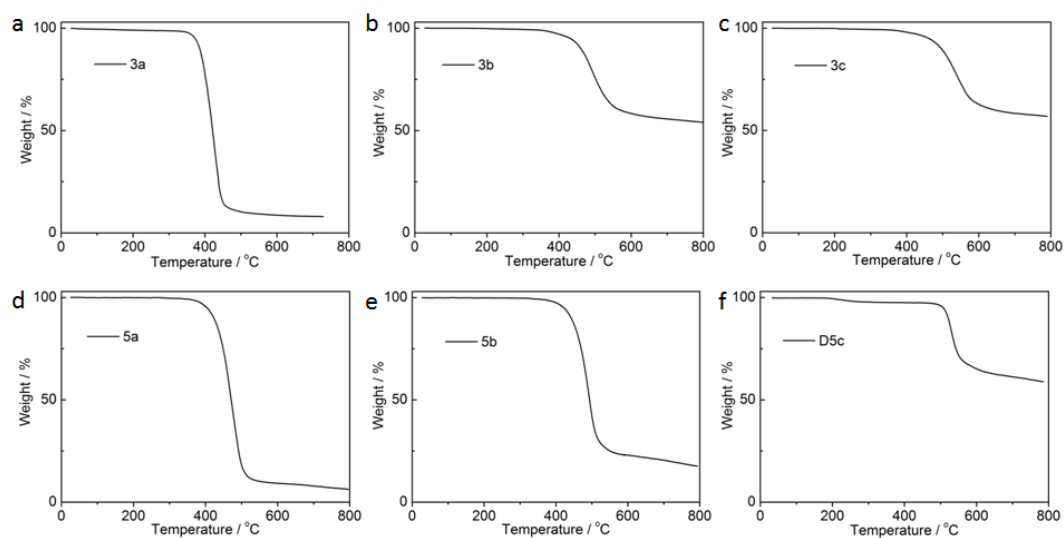

Figure S2 TGA data of compounds **3** and **5/D5c**.



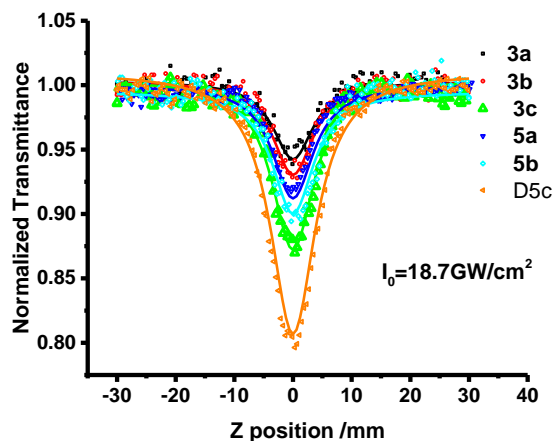

Figure S3 Open-aperture Z-scan of **3a**, **3b**, **3c**, **5a**, **5b**, **D5c** with a 190 fs pulse at 515 nm. The dots represent the experimental data whereas the solid lines represent the numerical fitting.

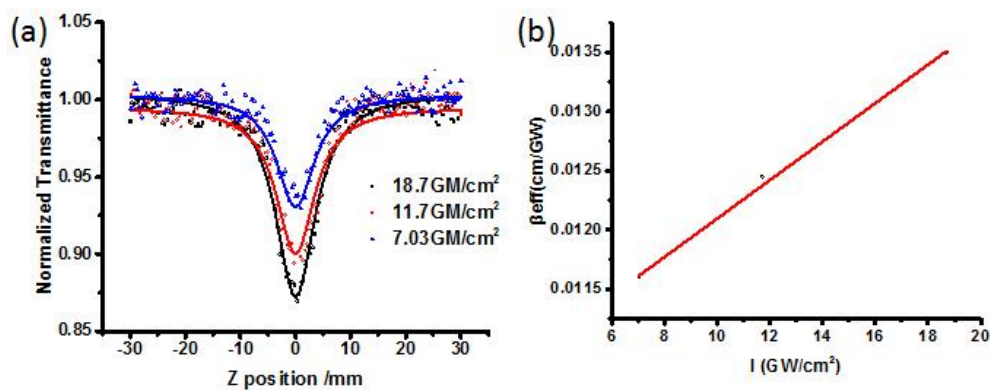

Figure S4 Open-aperture Z-scan of **3c** at 515 nm under 190 fs. The dots was experimental data, and solid lines represent theoretical fitting. (b) Example of the intensity dependence of the nonlinear absorption coefficient for **3c**.

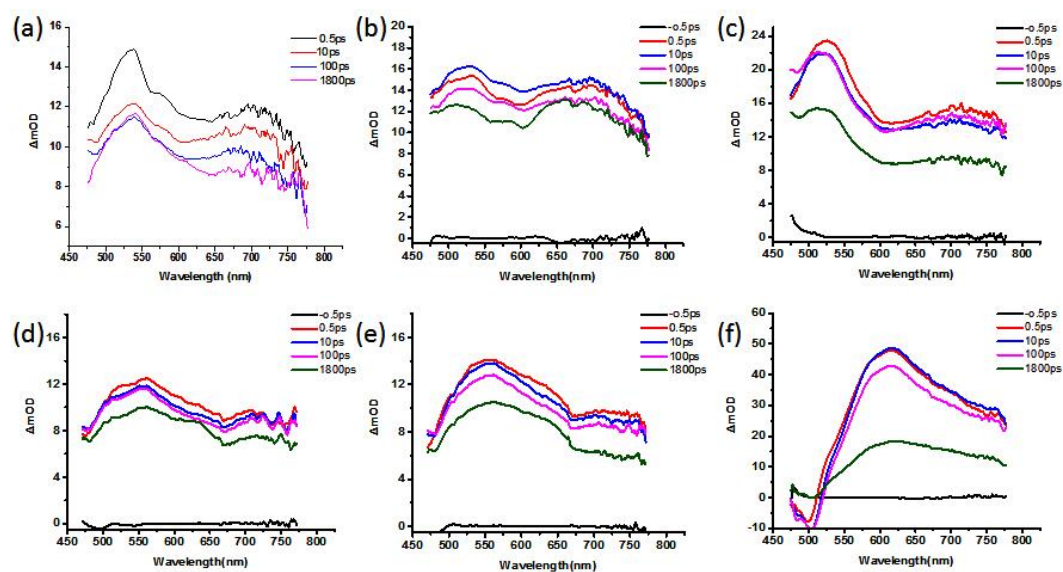

Figure S5 The transient absorption spectra of the samples (a) **3a**, (b) **3b**, (c) **3c**, (d) **5a**, (e) **5b**, (f) **D5c**.

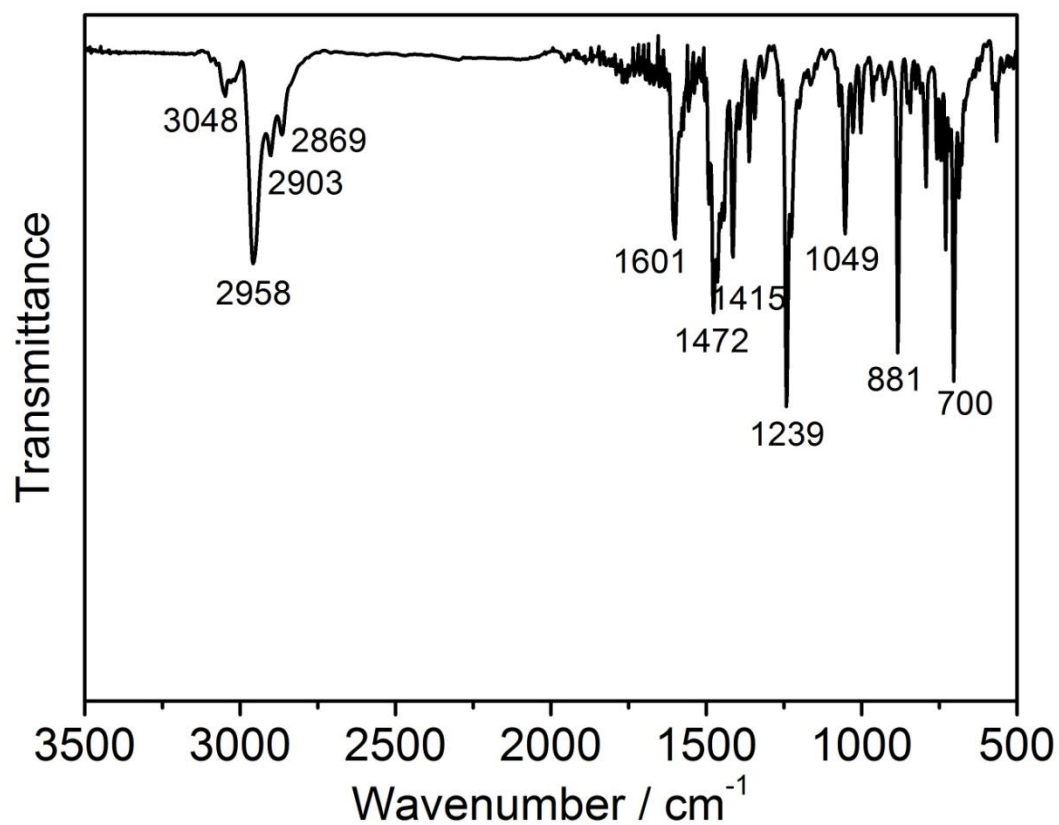

Figure S6 FT-IR spectrum of **2**.

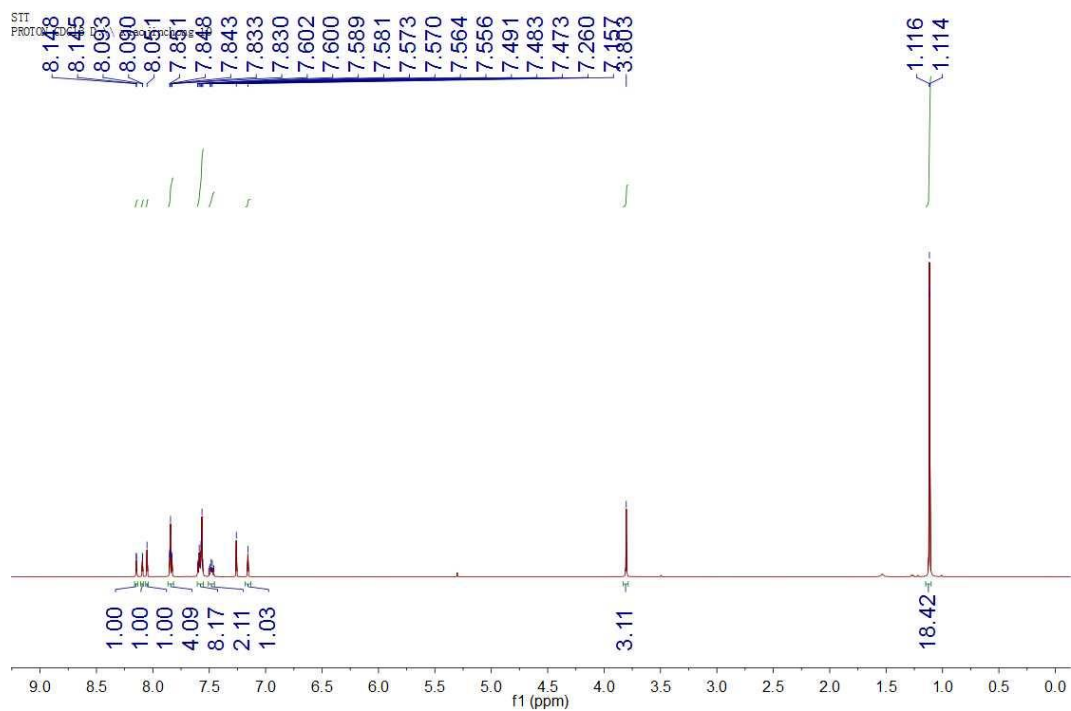

Figure S7  $^1\text{H}$  NMR spectrum of **2**.

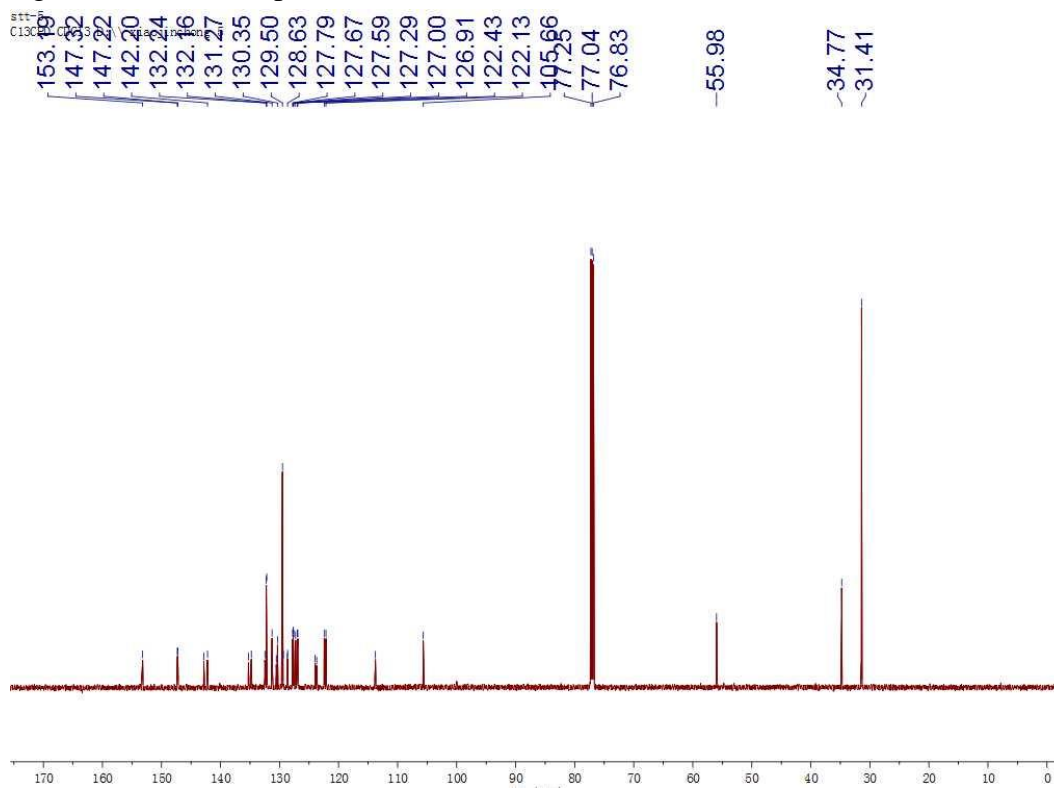

Figure S8  $^{13}\text{C}$  NMR spectrum of **2**.

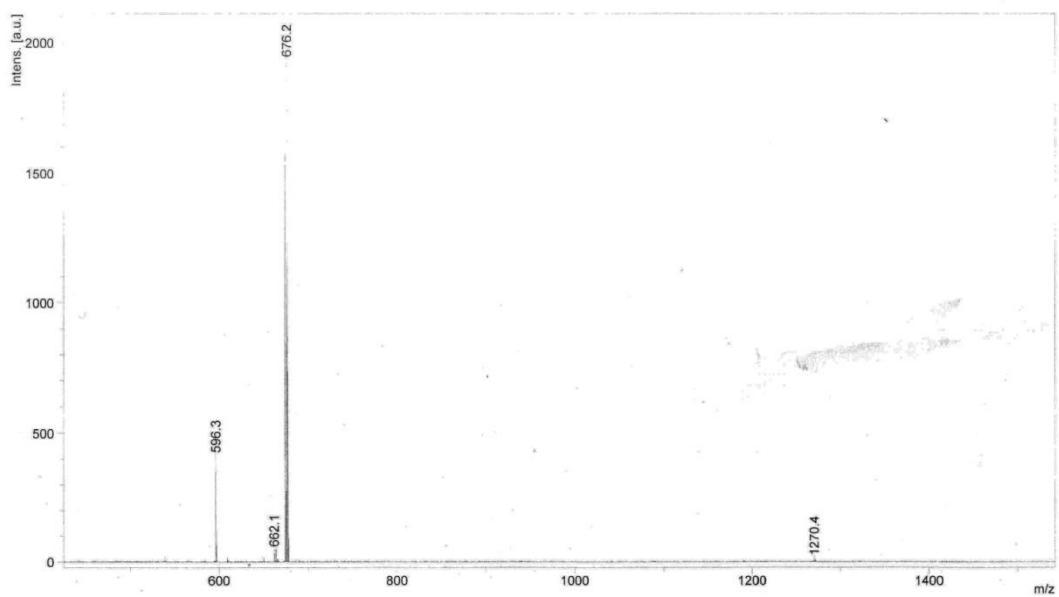

Figure S9 MALDI-TOF spectrum of **2**.

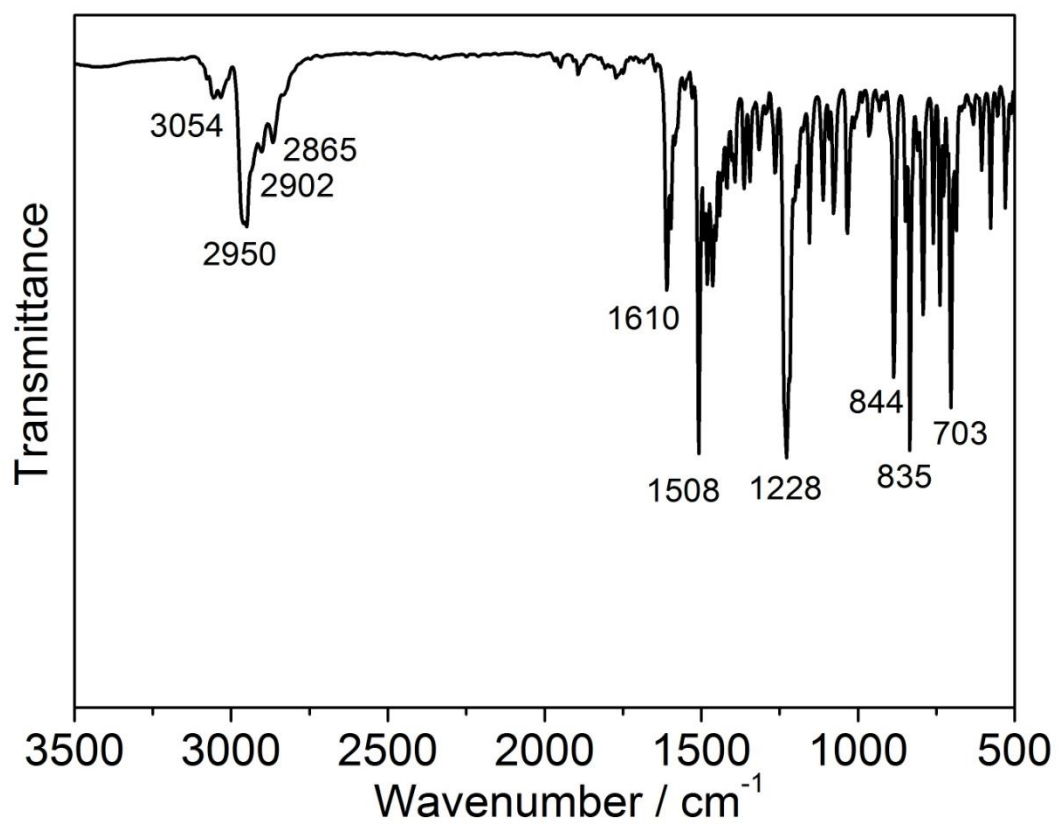

Figure S10 FT-IR spectrum of **3a**.

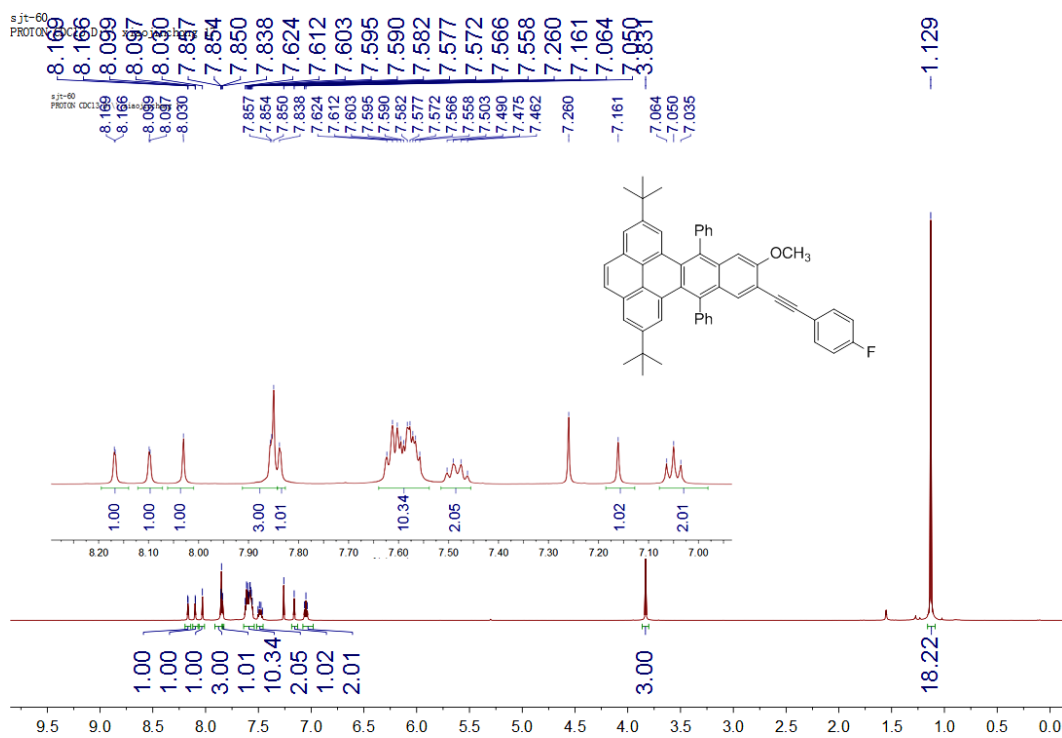

Figure S11 <sup>1</sup>H NMR spectrum of **3a** (600 MHz).

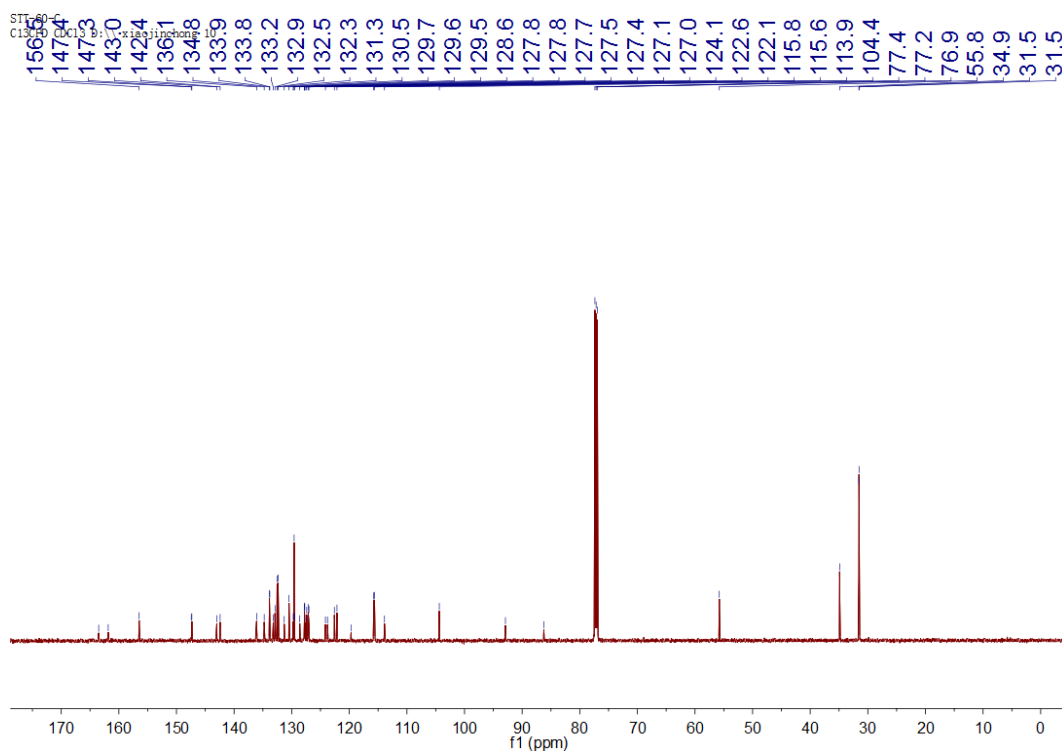

Figure S12 <sup>13</sup>C NMR spectrum of **3a** (150 MHz).

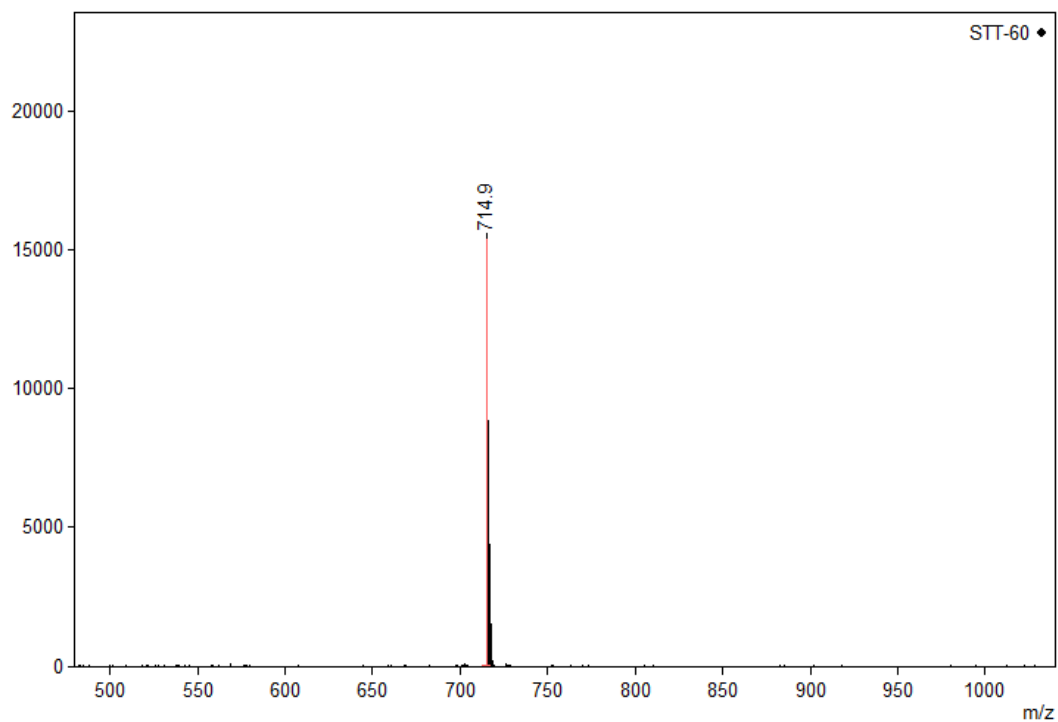

Figure S13 MALDI-TOF spectrum of **3a**.

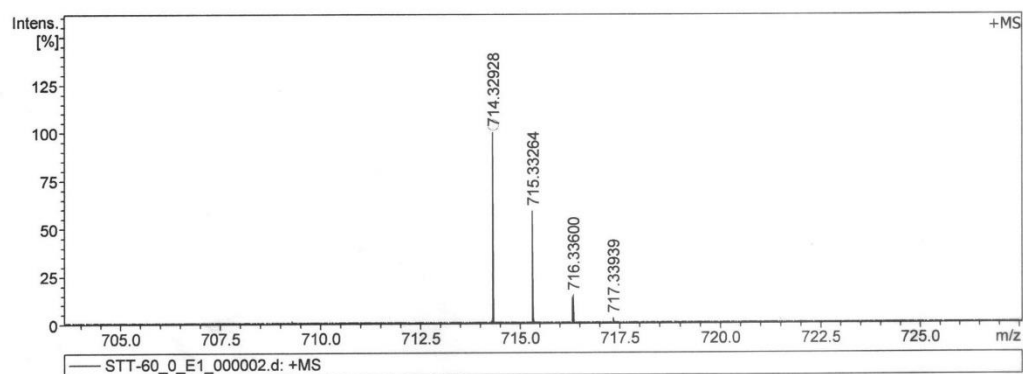

| Meas. m/z  | # | Ion Formula                        | Score  | m/z        | err [ppm] | Mean err [ppm] | mSigma | rdb  | e <sup>-</sup> Conf | N-Rule |
|------------|---|------------------------------------|--------|------------|-----------|----------------|--------|------|---------------------|--------|
| 714.329281 | 1 | C <sub>53</sub> H <sub>43</sub> FO | 100.00 | 714.329246 | 0.0       | -0.0           | 10.0   | 32.0 | odd                 | ok     |

Figure S14 HR-MS spectrum of **3a**.

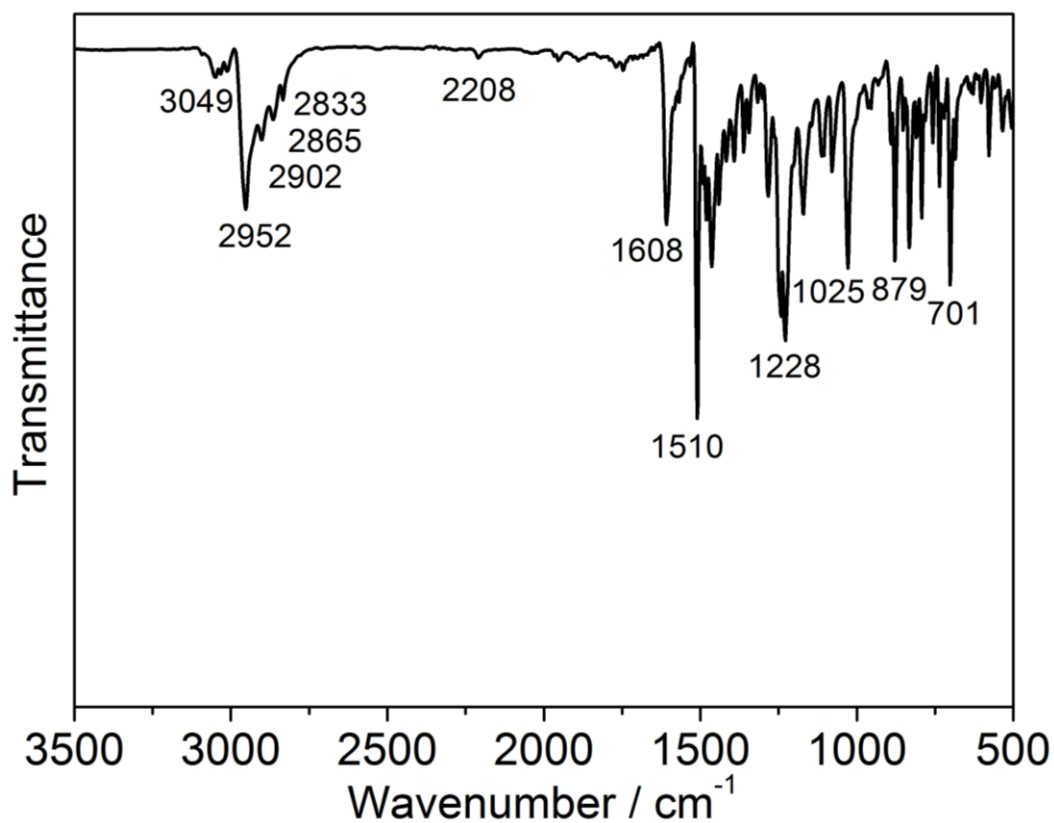

Figure S15 FT-IR spectrum of **3b**.

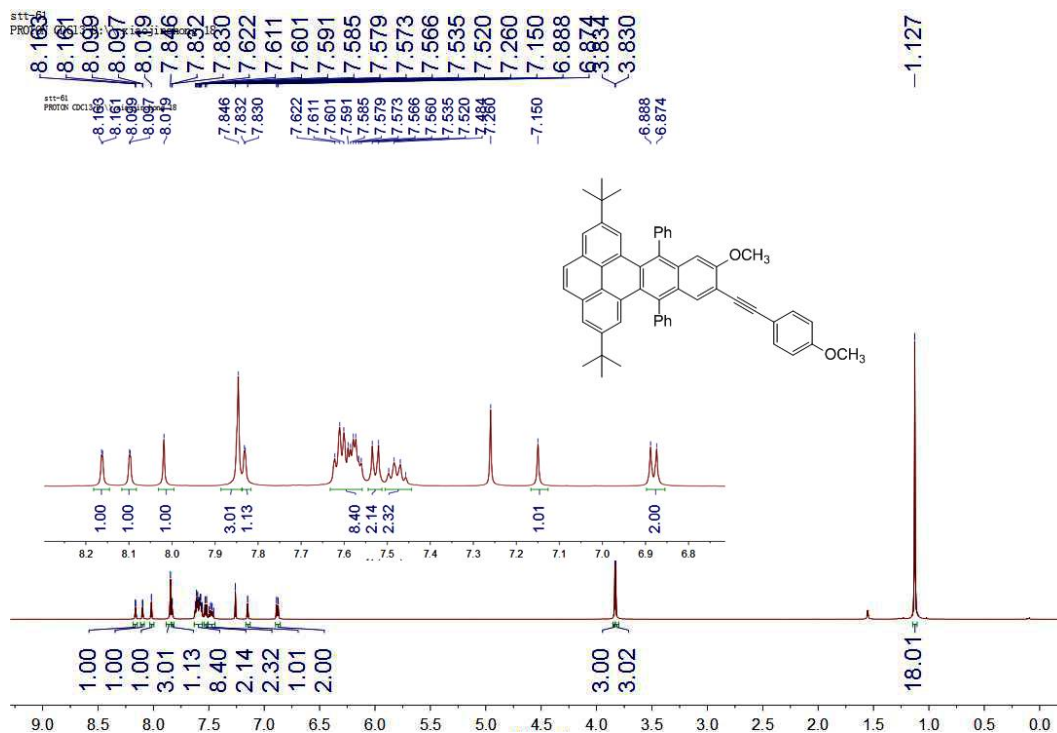

Figure S16  $^1\text{H}$  NMR spectrum of **3b**.

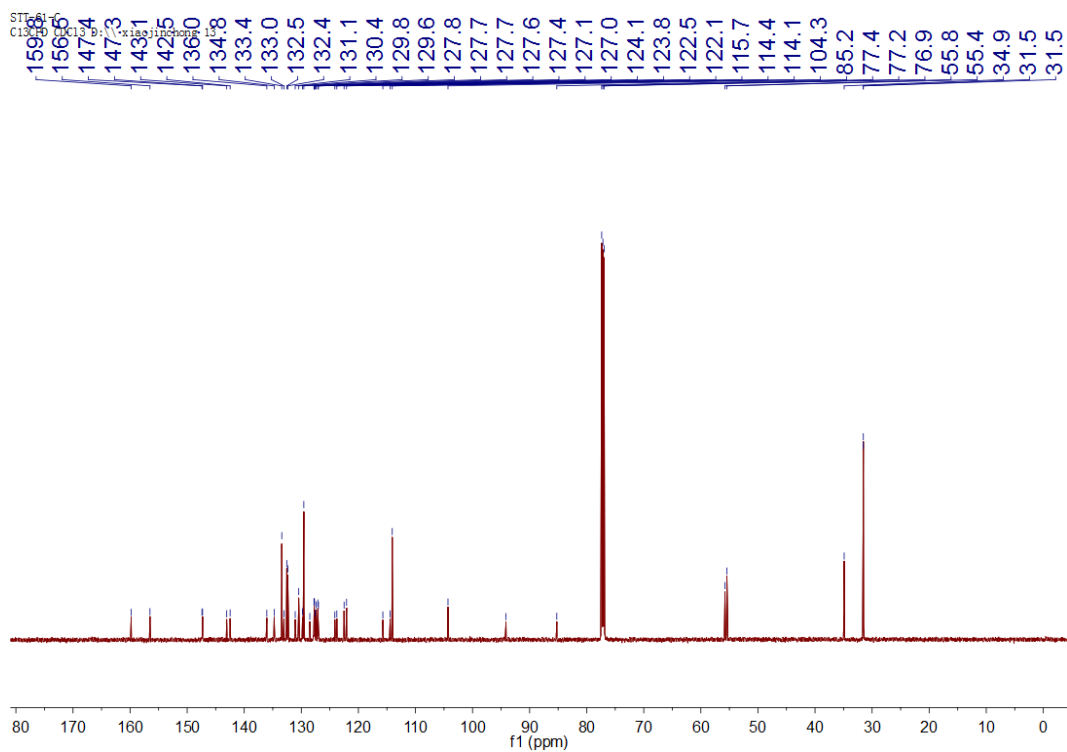

Figure S17  $^{13}\text{C}$  NMR spectrum of **3b**.

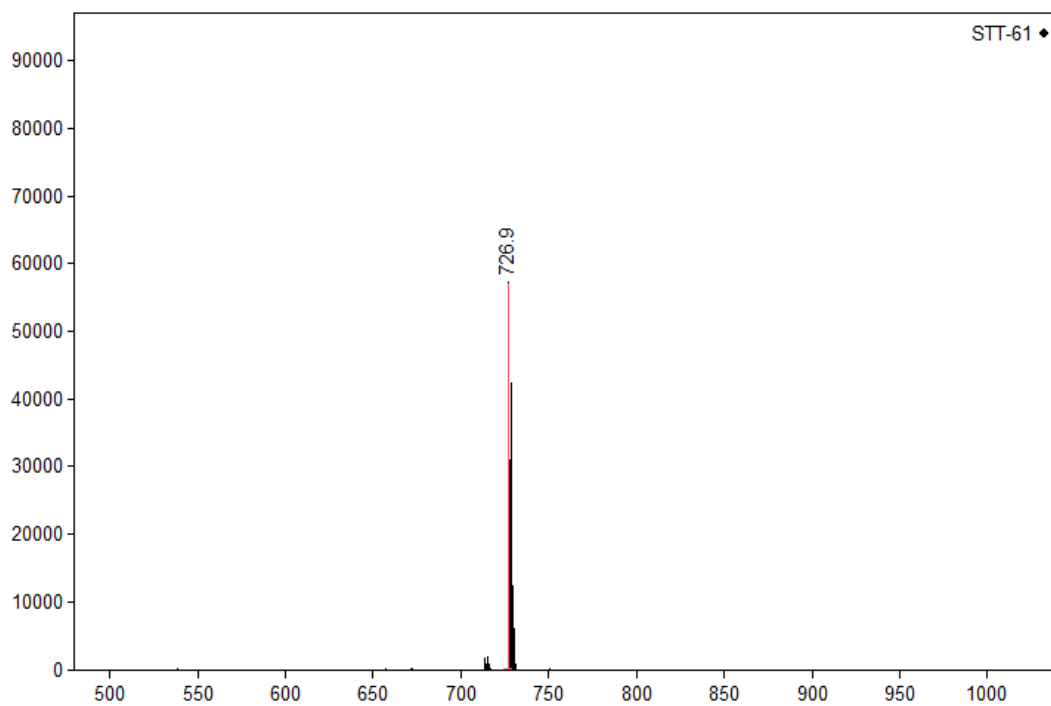

Figure S18 MALDI-TOF spectrum of **3b**.



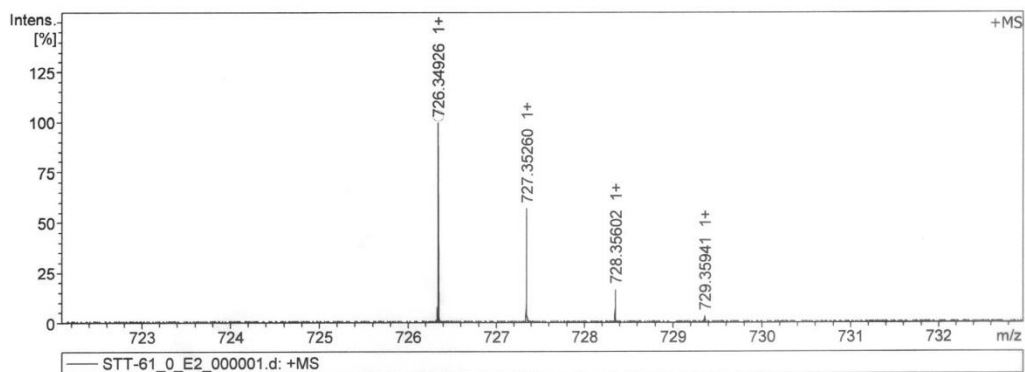

| Meas. m/z  | # | Ion Formula | Score  | m/z        | err [ppm] | Mean err [ppm] | mSigma | rdb  | e <sup>-</sup> Conf | N-Rule |
|------------|---|-------------|--------|------------|-----------|----------------|--------|------|---------------------|--------|
| 726.349263 | 1 | C54H46O2    | 100.00 | 726.349232 | 0.0       | -0.0           | 8.4    | 32.0 | odd                 | ok     |

Figure S19 HR-MS spectrum of **3b**.

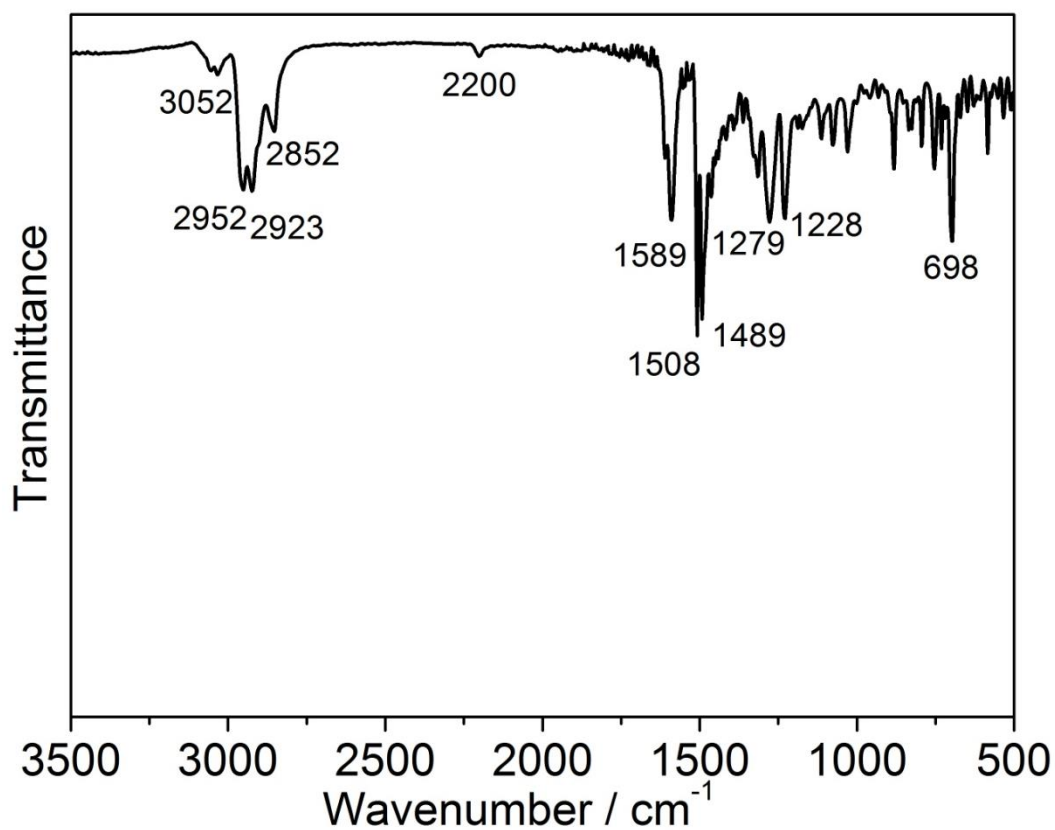

Figure S20 FT-IR spectrum of **3c**.

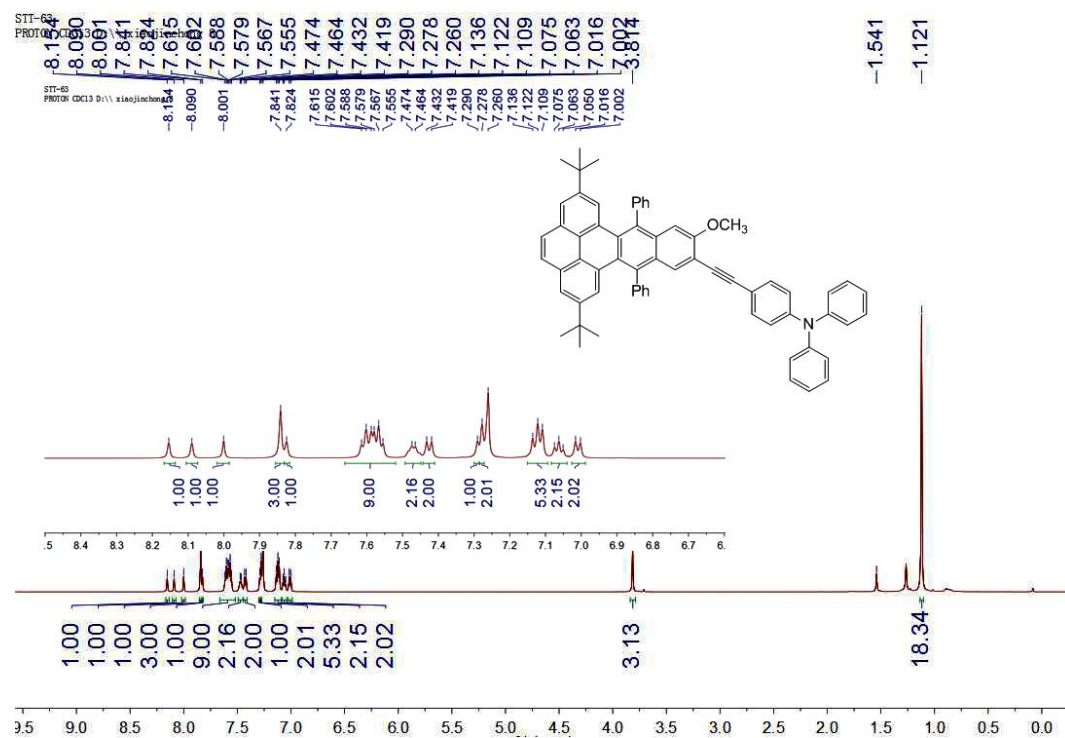

Figure S21 <sup>1</sup>H NMR spectrum of **3c**.

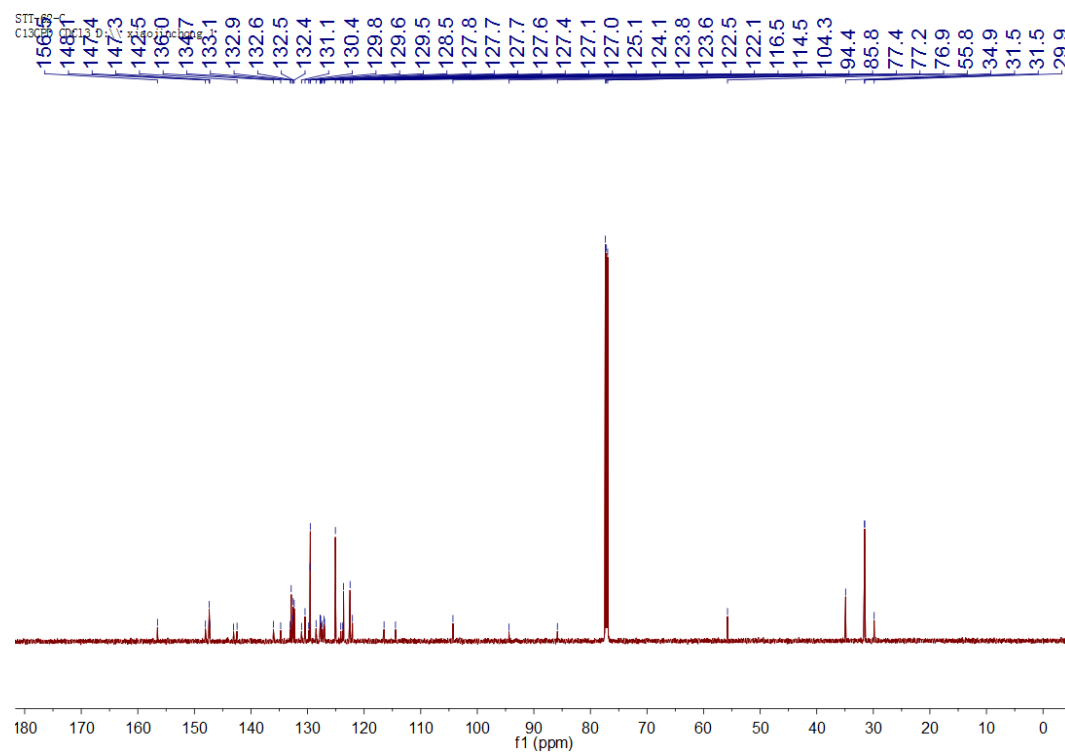

Figure S22 <sup>13</sup>C NMR spectrum of **3c**.

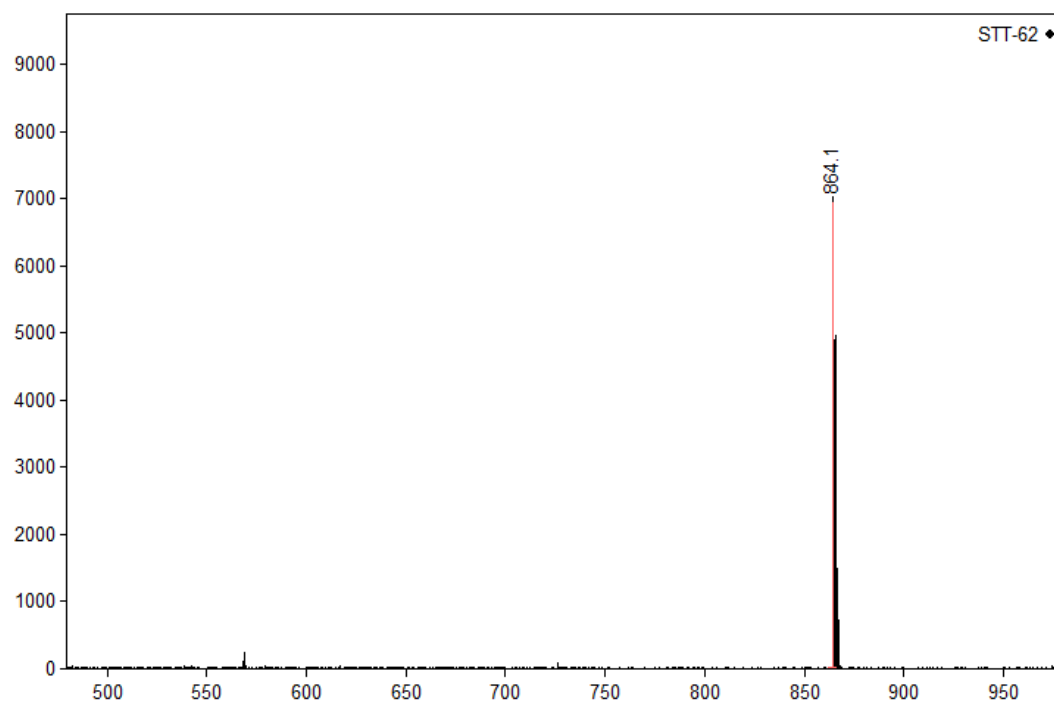

Figure S23 MALDI-TOF spectrum of **3c**.

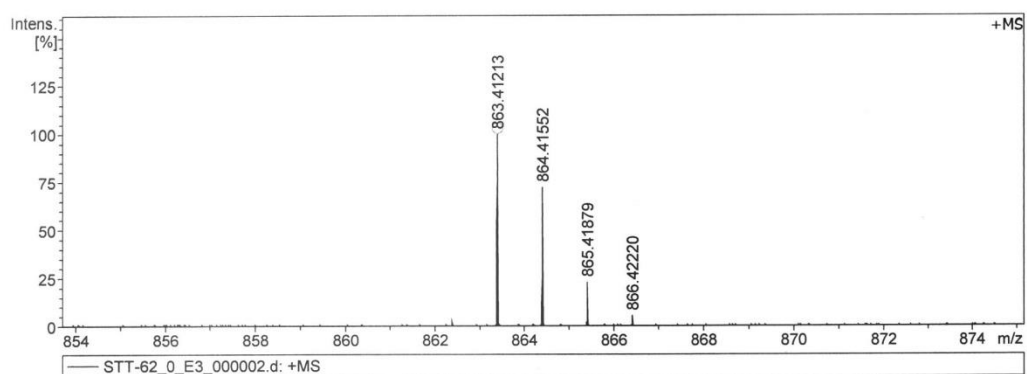

| Meas. m/z  | # | Ion Formula                                    | Score  | m/z        | err [ppm] | Mean err [ppm] | mSigma | rdb  | e <sup>-</sup> Conf | N-Rule |
|------------|---|------------------------------------------------|--------|------------|-----------|----------------|--------|------|---------------------|--------|
| 863.412134 | 1 | C <sub>6</sub> H <sub>5</sub> N <sub>3</sub> O | 100.00 | 863.412167 | -0.0      | 0.0            | 12.1   | 40.0 | odd                 | ok     |

Figure S24 HR-MS spectrum of **3c**.

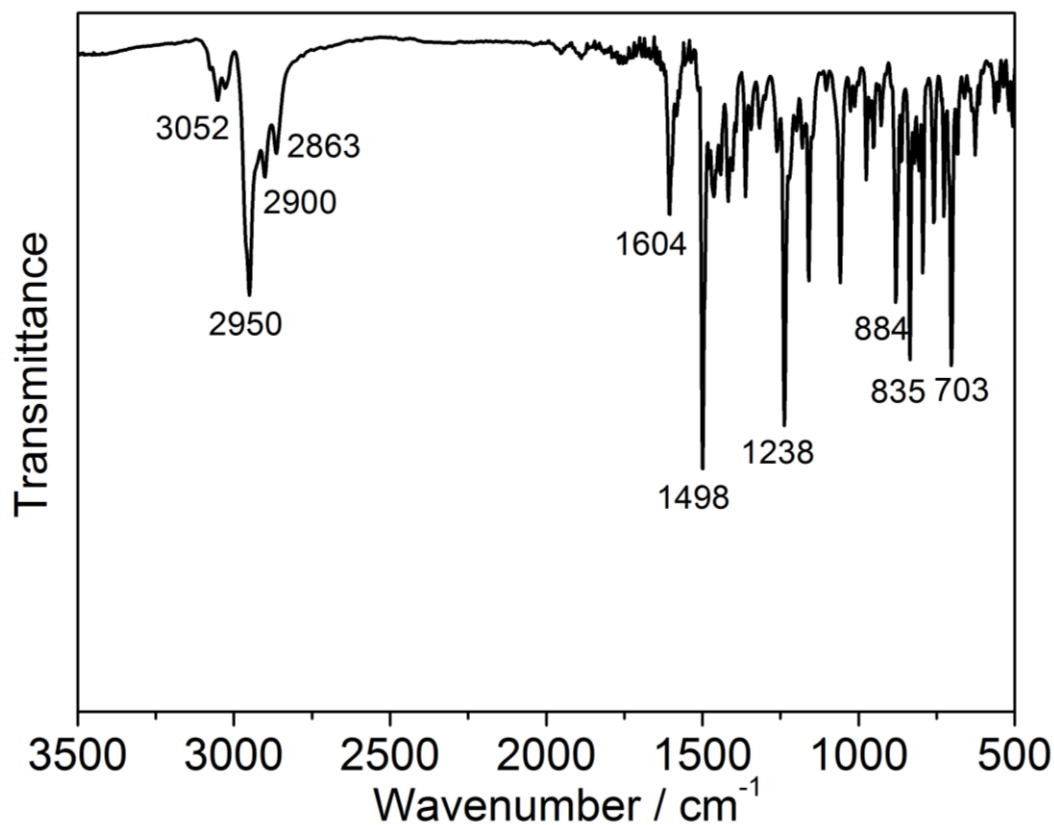

Figure S25 FT-IR spectrum of **4a**.

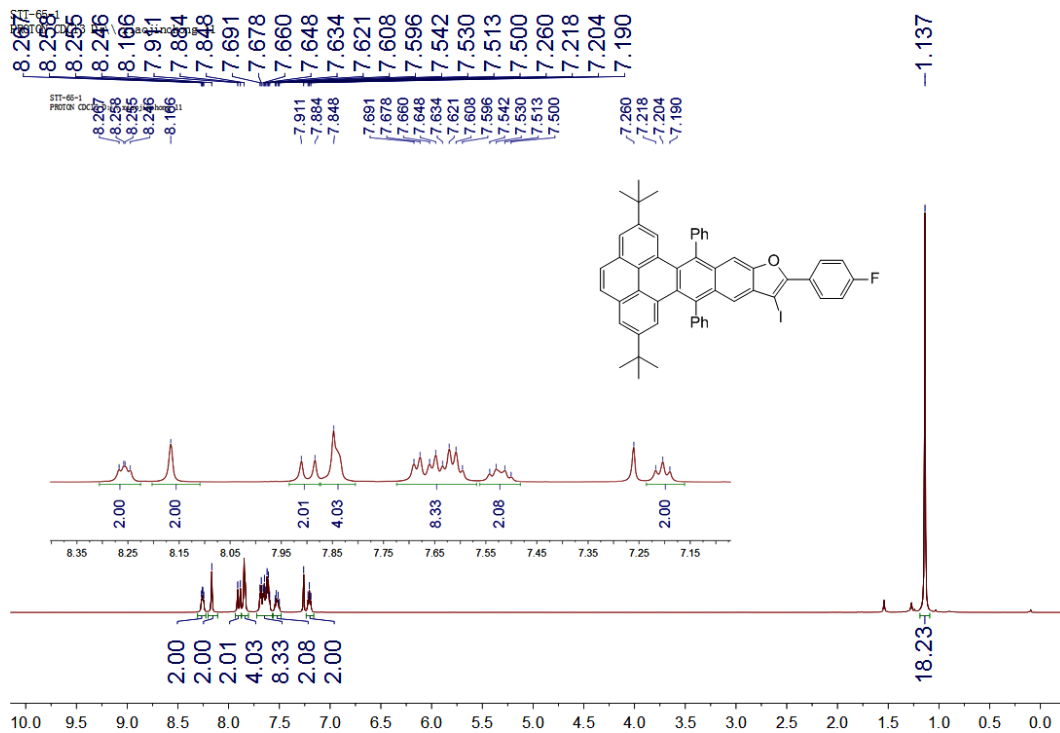

Figure S26  $^1\text{H}$  NMR spectrum of **4a**.

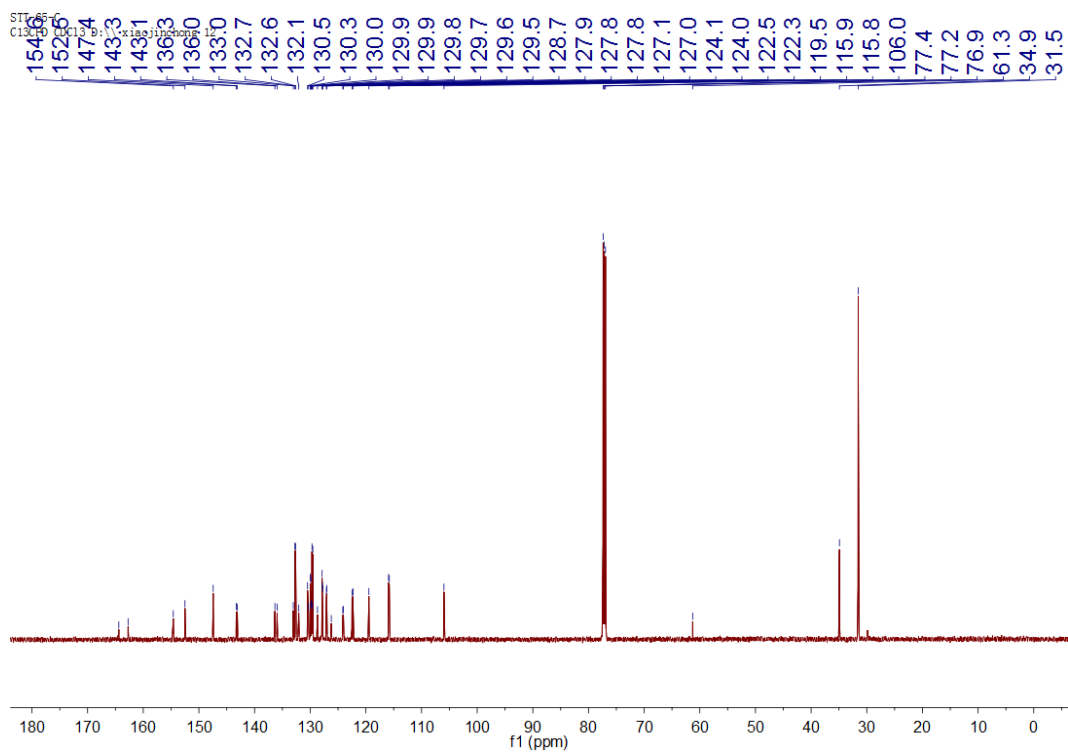

Figure S27  $^{13}\text{C}$  NMR spectrum of **4a**.

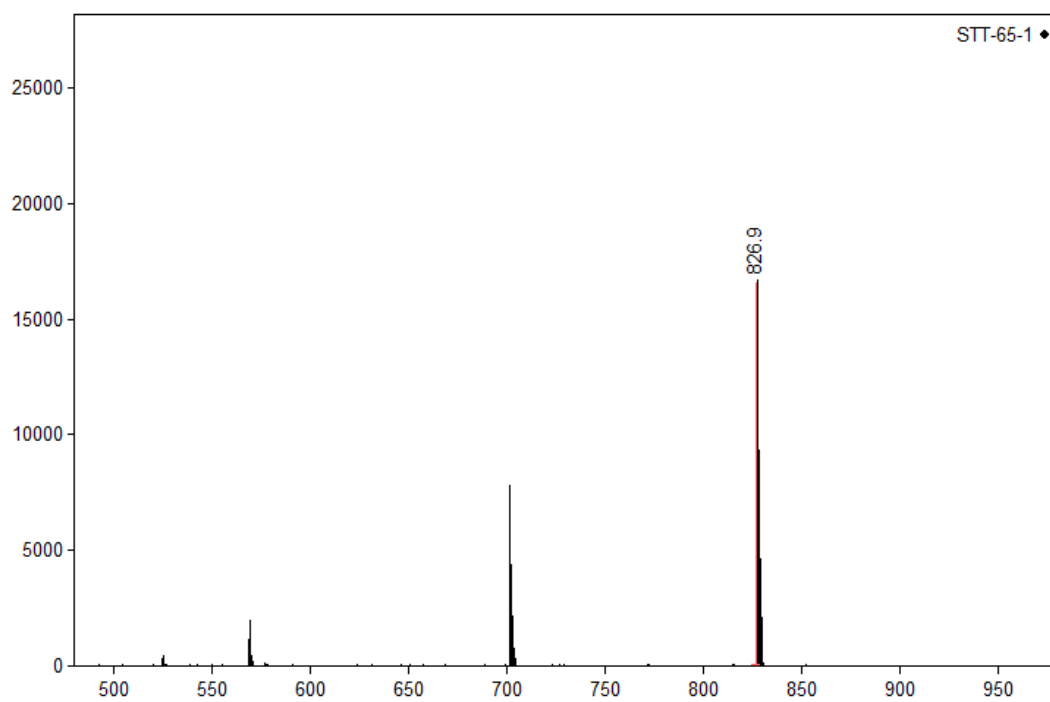

Figure S28 MALDI-TOF spectrum of **4a**.

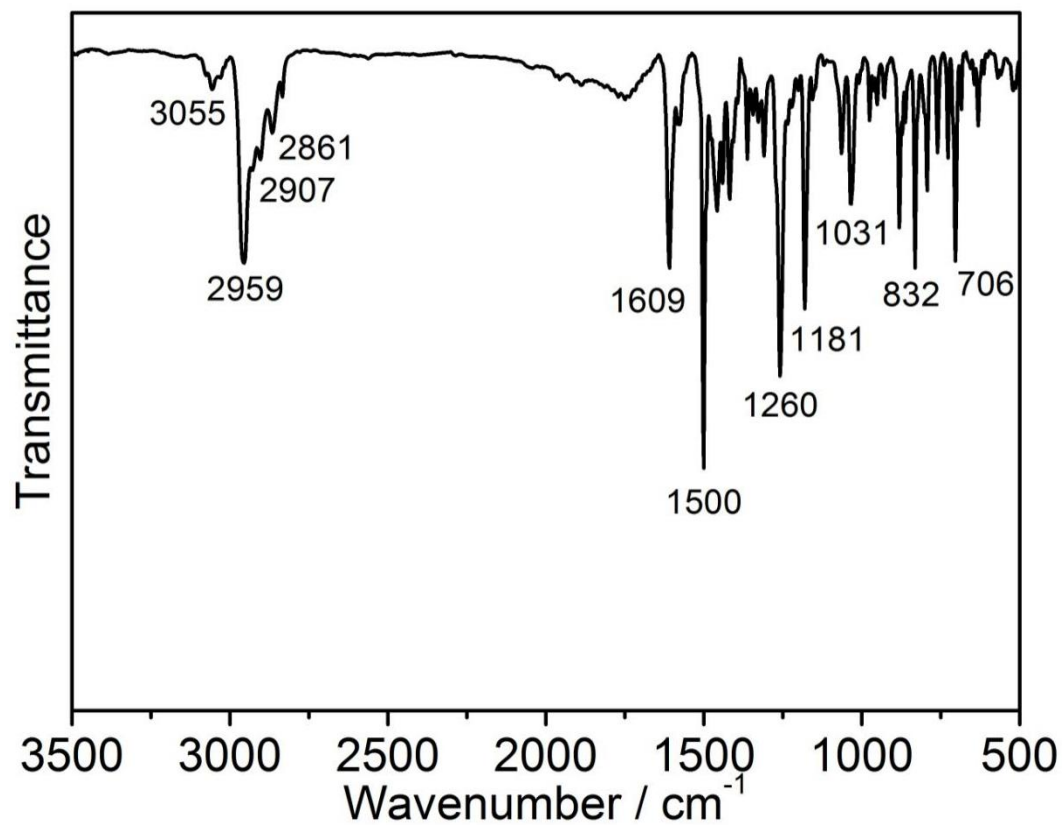

Figure S29 FT-IR spectrum of **4b**.

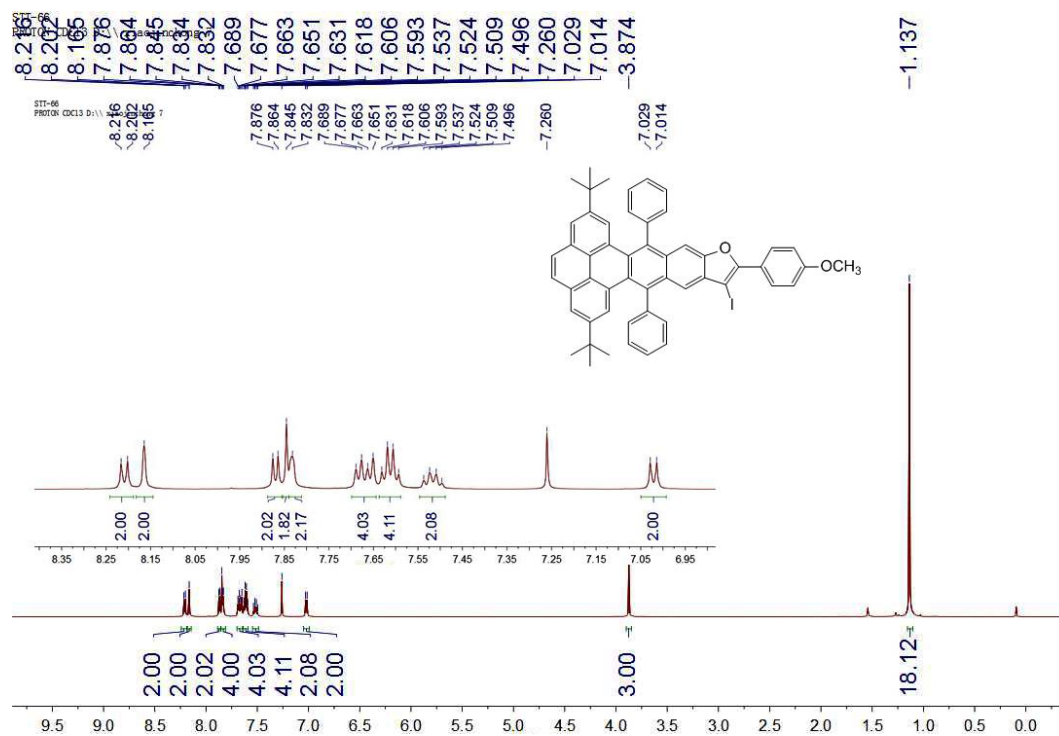

Figure S30  $^1\text{H}$  NMR spectrum of **4b**.

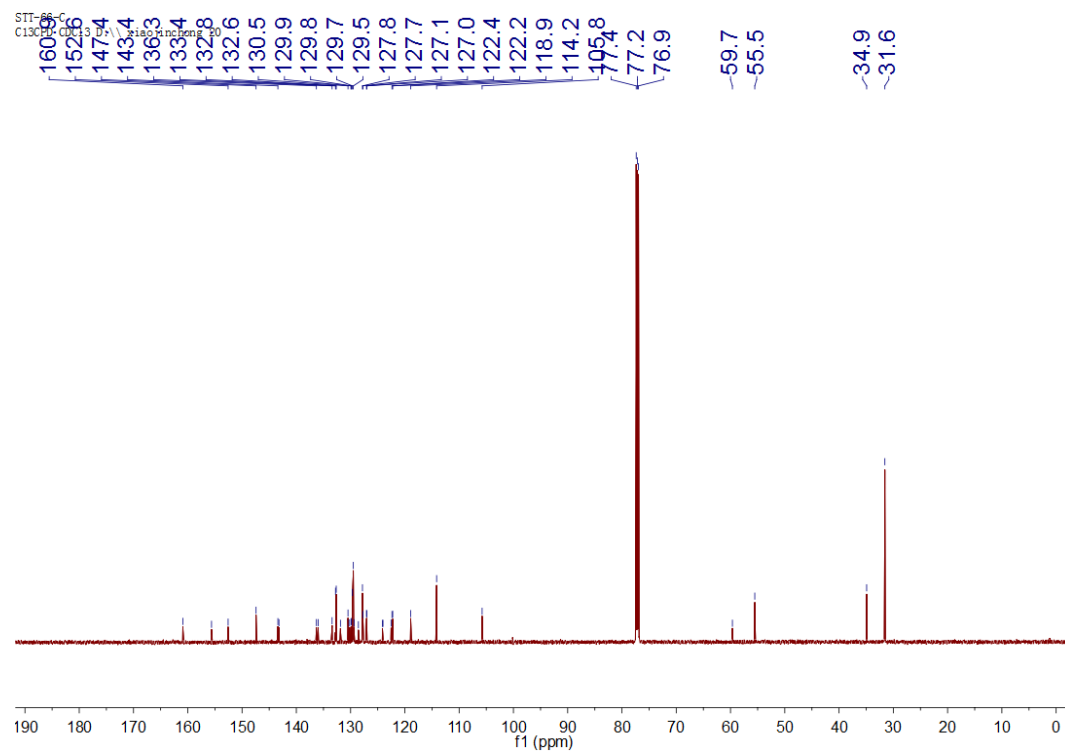

Figure S31  $^{13}\text{C}$  NMR spectrum of **4b**.

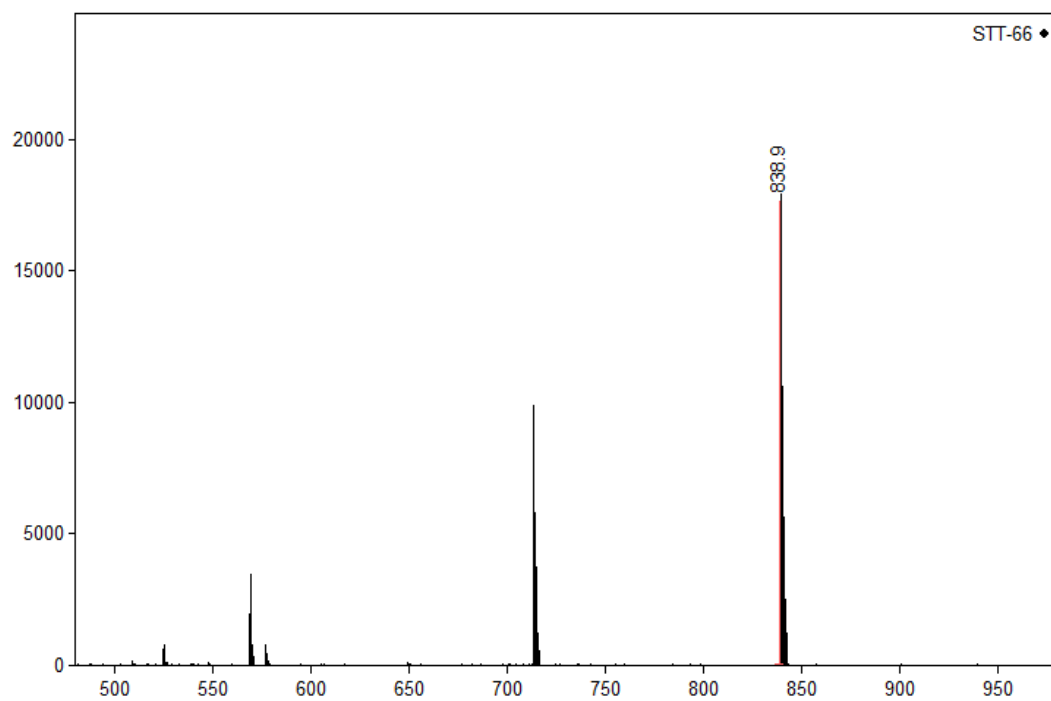

Figure S32 MALDI-TOF spectrum of **4b**.

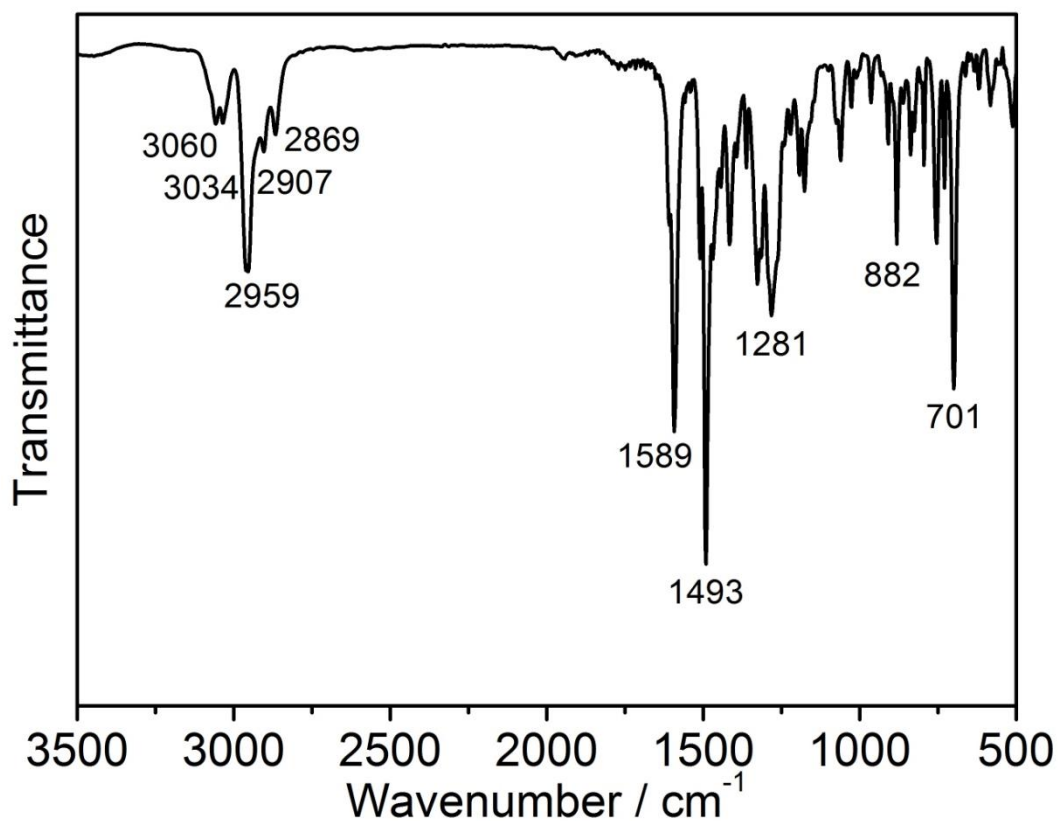

Figure S33 FT-IR spectrum of **D5c**.

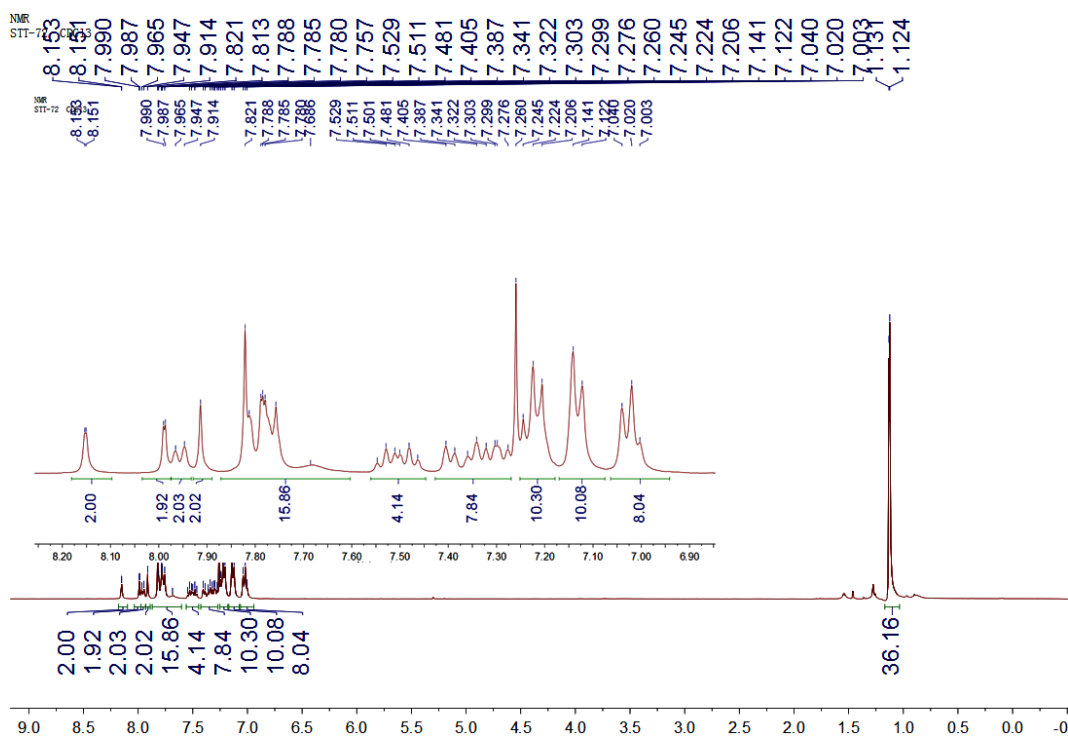

Figure S34  $^1\text{H}$  NMR spectrum of **D5c** (400 MHz).



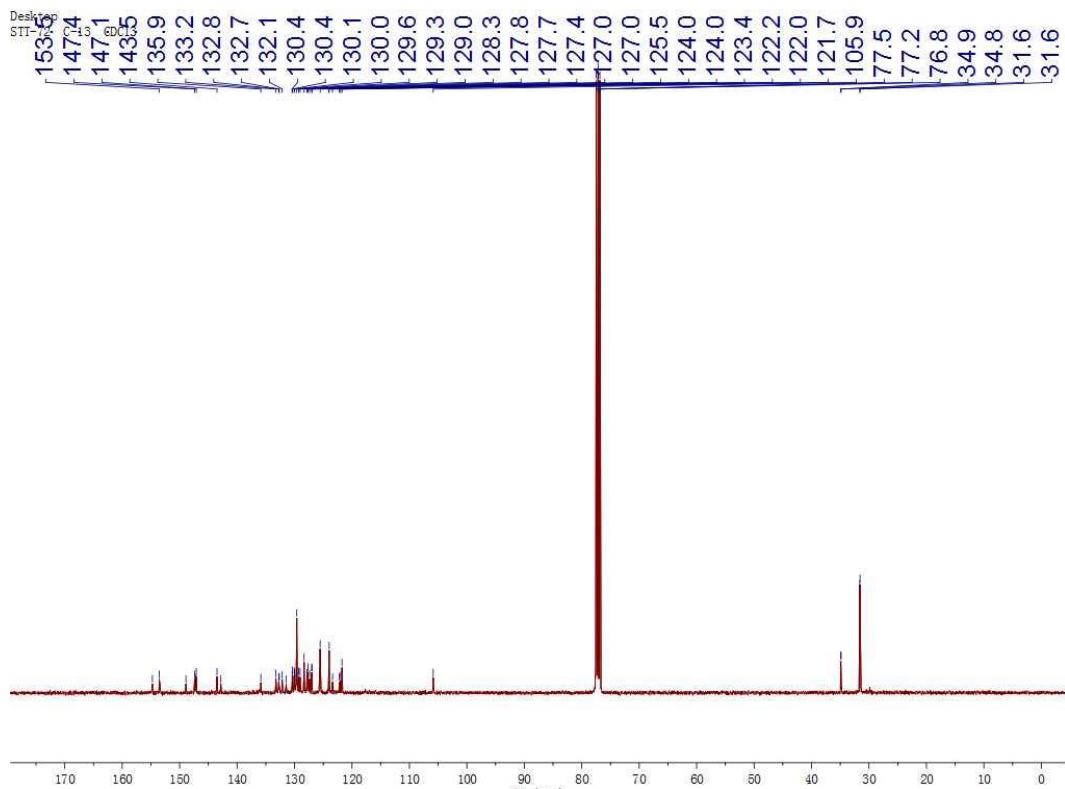

Figure S35  $^{13}\text{C}$  NMR spectrum of **D5c** (100MHz).

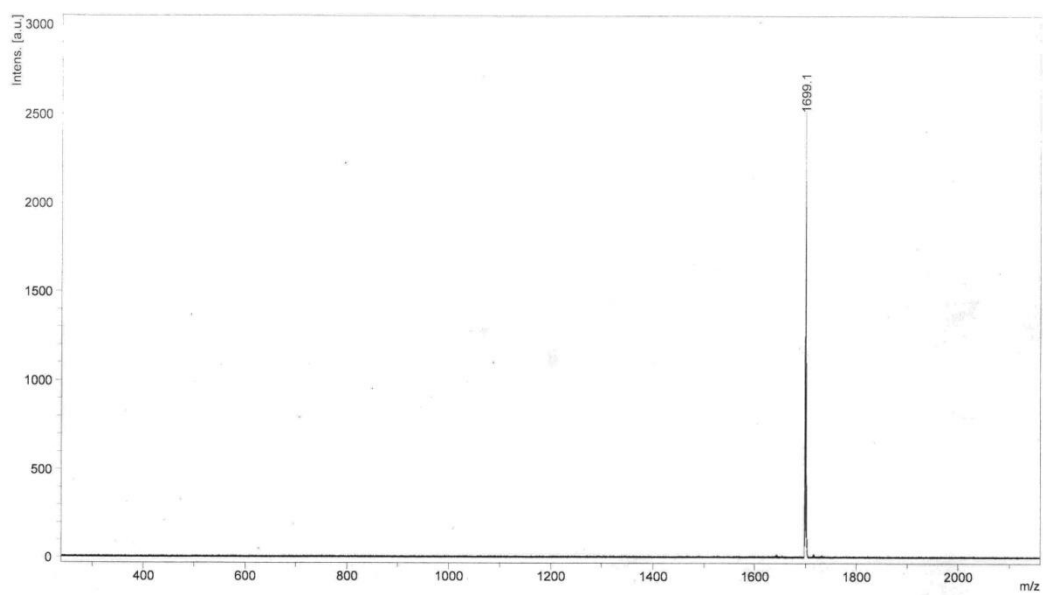

Figure S36 MALDI-TOF spectrum of **D5c**.

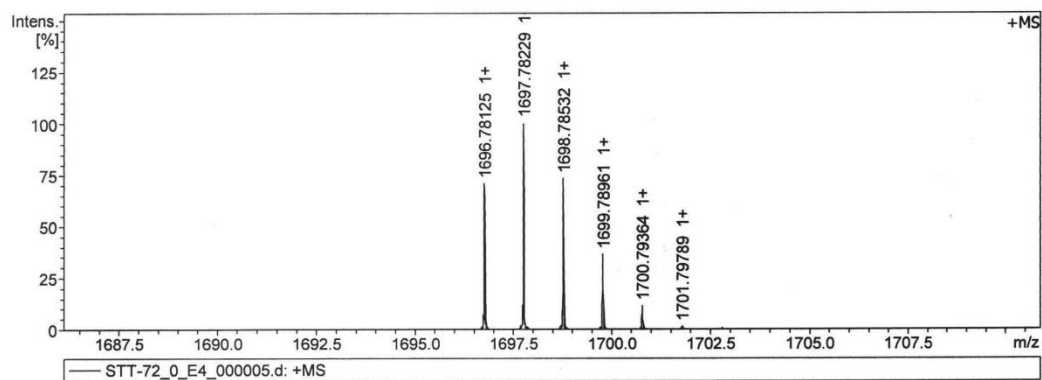

Figure S37 HR-MS spectrum of **D5c**.

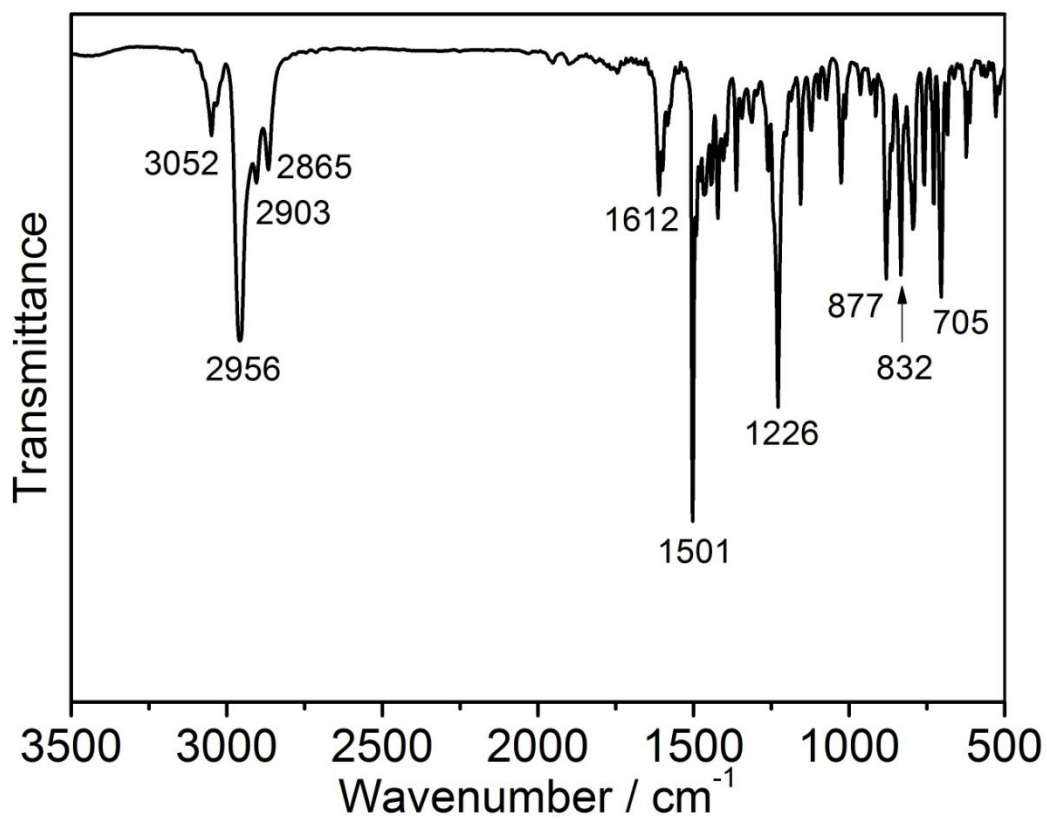

Figure S38 FT-IR spectrum of **5a**.

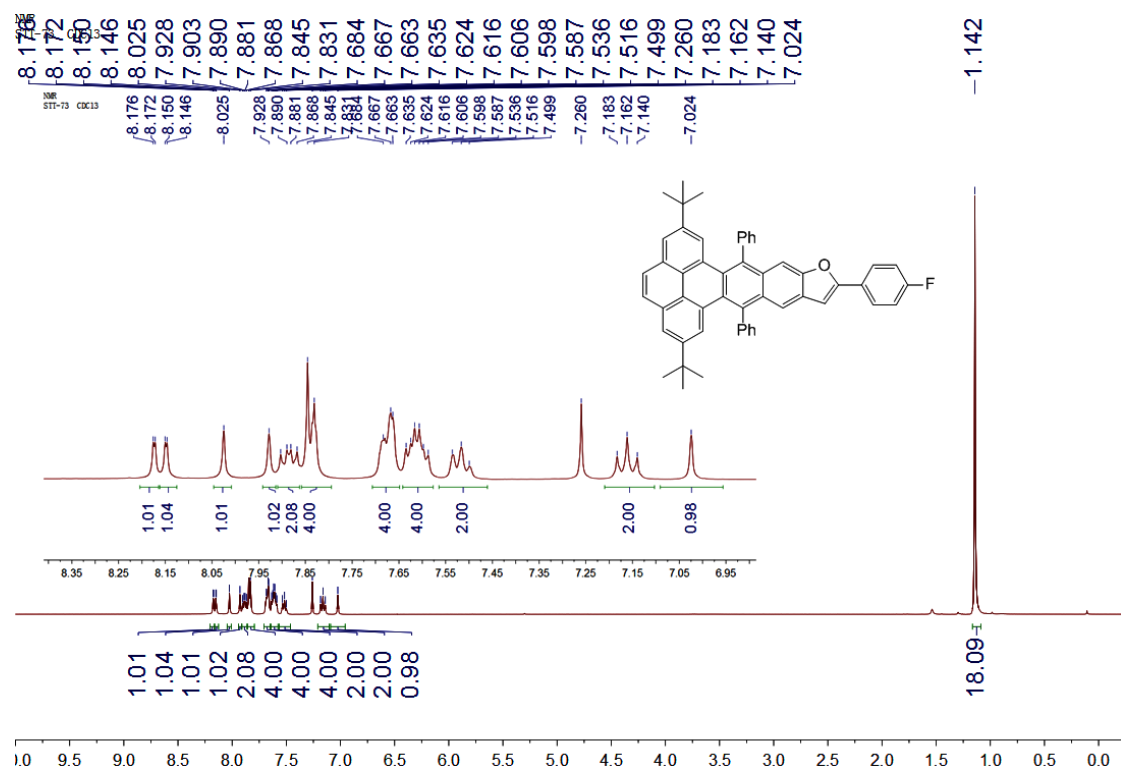

Figure S39 <sup>1</sup>H NMR spectrum of 5a (400 MHz).

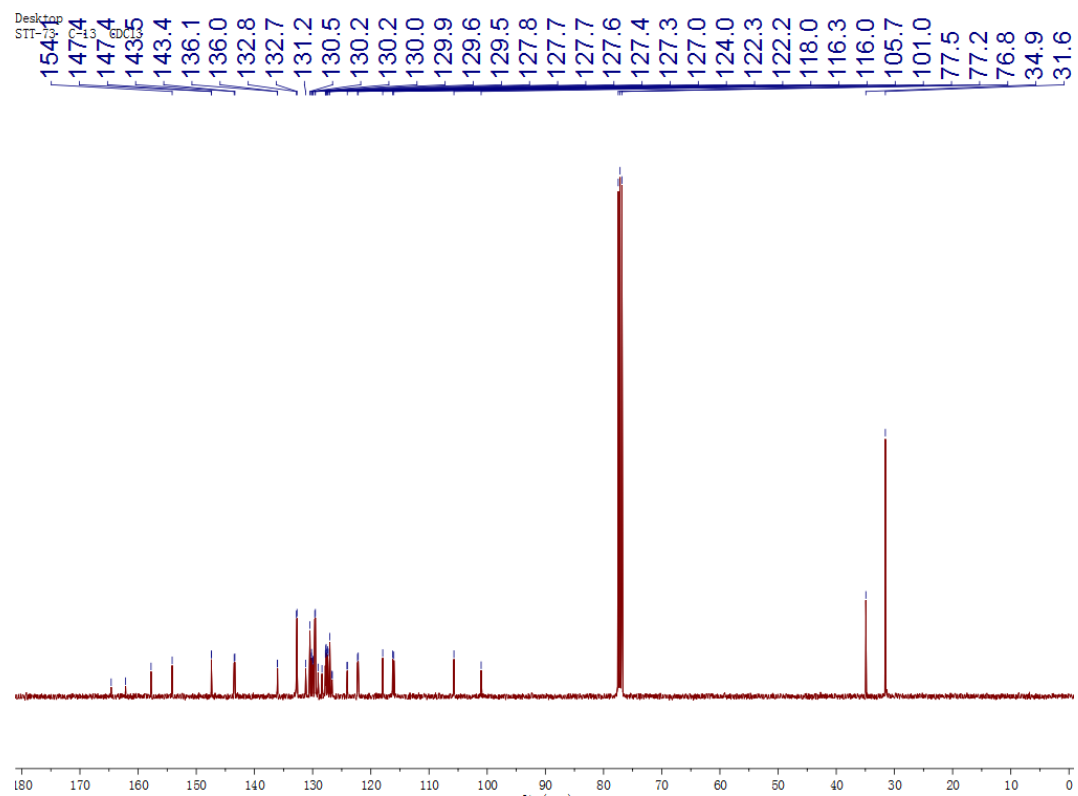

Figure S40 <sup>13</sup>C NMR spectrum of 5a (100 MHz).

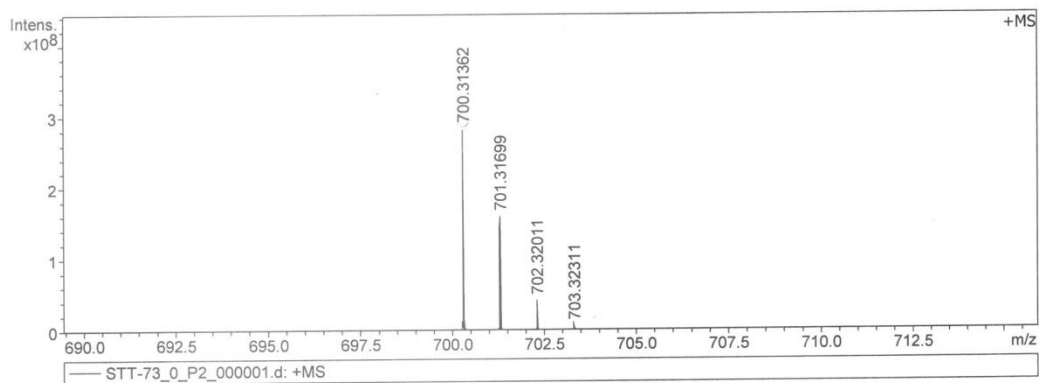

| Meas. m/z  | # | Ion Formula | Score  | m/z        | err [ppm] | Mean err [ppm] | mSigma | rdb  | e <sup>-</sup> Conf | N-Rule |
|------------|---|-------------|--------|------------|-----------|----------------|--------|------|---------------------|--------|
| 700.313617 | 1 | C52H41FO    | 100.00 | 700.313596 | -0.0      | 0.0            | 5.9    | 32.0 | odd                 | ok     |

Figure S41 HR-MS spectrum of **5a**.

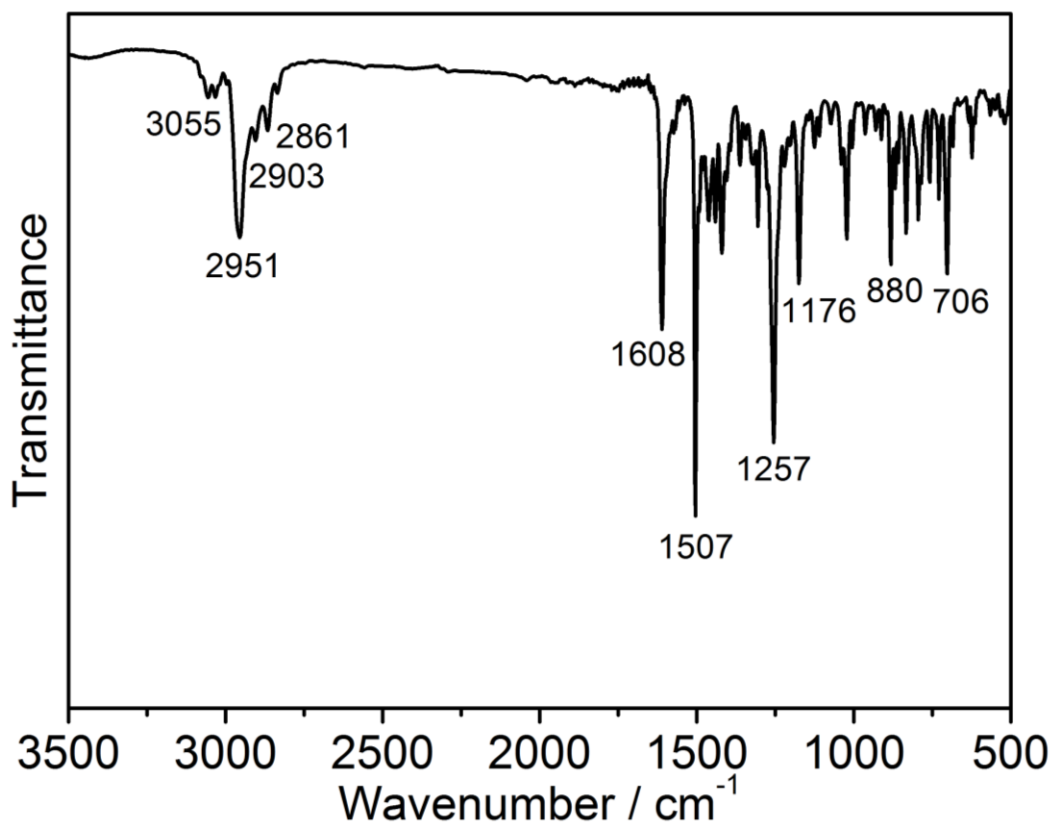

Figure S42 FT-IR spectrum of **5b**.

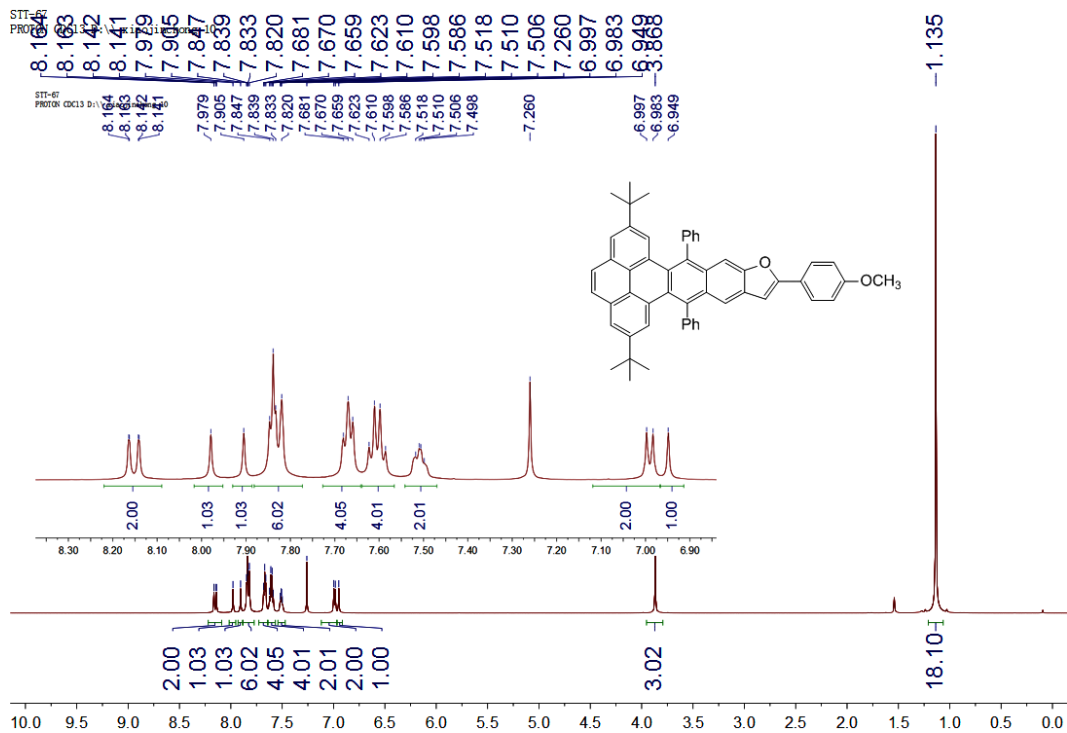

Figure S43 <sup>1</sup>H NMR spectrum of **5b** (600 MHz).

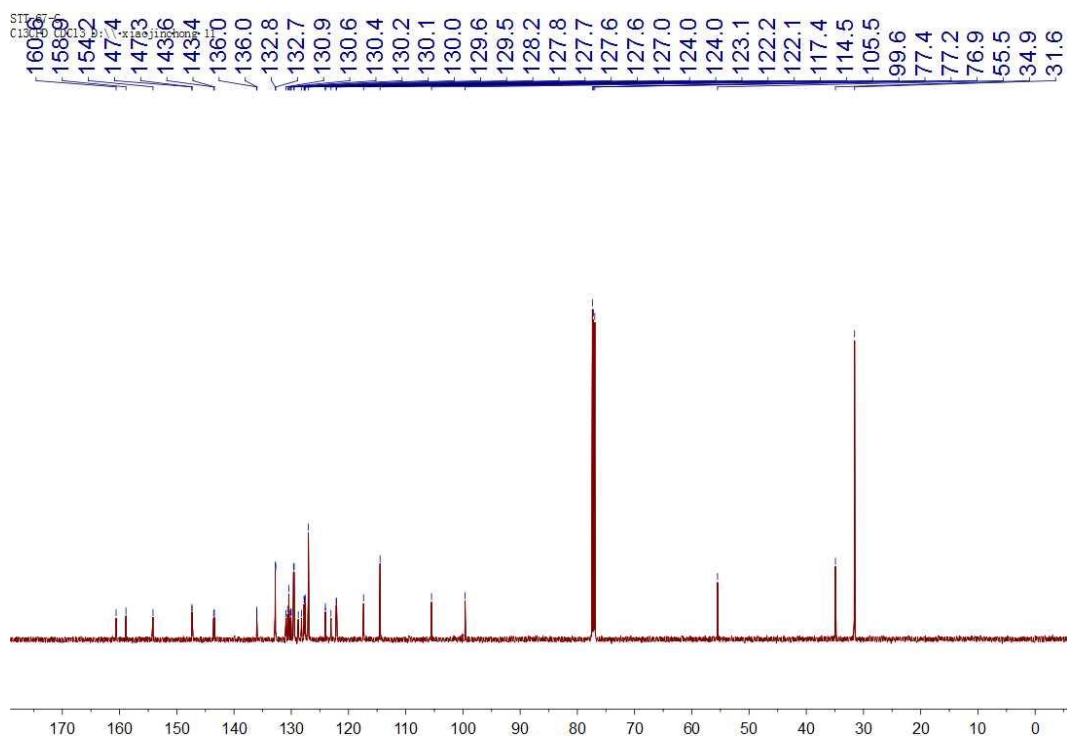

Figure S44 <sup>13</sup>C NMR spectrum of **5b**.

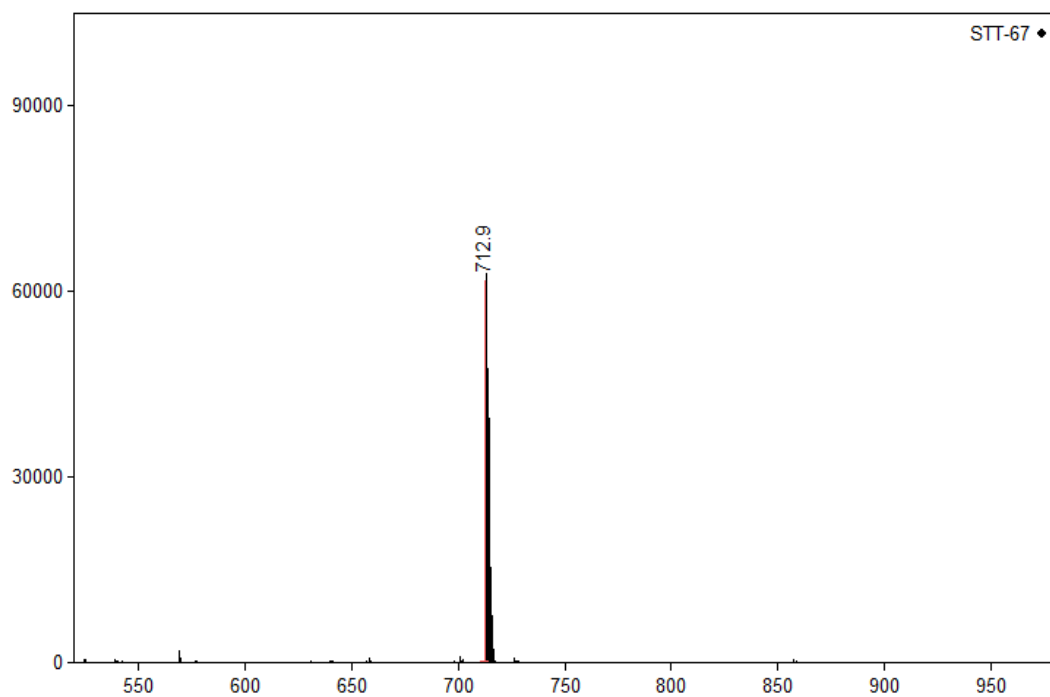

Figure S45 MALDI-TOF spectrum of **5b**.

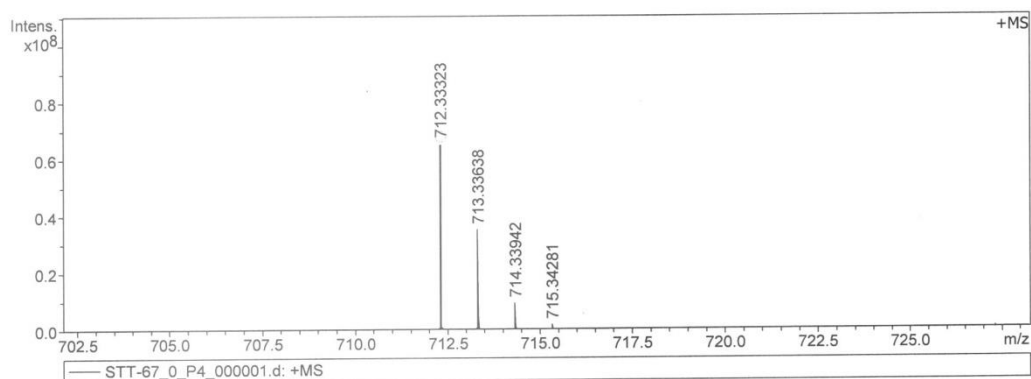

| Meas. m/z  | # | Ion Formula                                    | Score  | m/z        | err [ppm] | Mean err [ppm] | mSigma | rdb  | e <sup>-</sup> Conf | N-Rule |
|------------|---|------------------------------------------------|--------|------------|-----------|----------------|--------|------|---------------------|--------|
| 712.333230 | 1 | C <sub>53</sub> H <sub>44</sub> O <sub>2</sub> | 100.00 | 712.333582 | -0.5      | 0.7            | 22.4   | 32.0 | odd                 | ok     |

Figure S46 HR-MS spectrum of **5b**.
